# Supplementary material
Source: PubMed Central journal article supplement (PMC10332325)
Supplement: NIHMS1911083-supplement-Supplementary_Material.pdf [file NIHMS1911083-supplement-Supplementary_Material.pdf]

## Supplementary Information

### **Matrix viscoelasticity controls spatio-temporal tissue organization**

Alberto Elosegui-Artola, Anupam Gupta, Alexander J. Najibi, Bo Ri Seo, Ryan Garry, Christina M. Tringides, Irene de Lázaro, Max Darnell, Wei Gu, Qiao Zhou, David A. Weitz, L. Mahadevan, David J. Mooney

Supplementary information included in this file:

- Supplementary Note 1.
- Supplementary Figures 1 to 23.
- Supplementary text describing the model.
- Supplementary Tables 1 to 3.

## Supplementary Note 1: Model dimensionless parameters

Systems with low  $\mu$  correspond to relatively viscous matrices, while those with high  $\mu$  correspond to matrices that are relatively fluid. When the scaled cell flux  $j$  is small, the pressure due to the growing tissue is not large enough to create fingers in the matrix, while when  $j$  is large, fingering likely arises as cells actively intrude into the matrix. Finally, systems with low values of  $A$  correspond to matrices that mechanically relax very slowly, while systems with high values of  $A$  correspond to matrices that relax very quickly. In our experiments and simulations, the ratio  $\mu = \mu_t/\mu_m \in [0.001-2]$ ,  $\tau_a \in [7-54]$ s, while  $\tau_m \in [1-350]$ s, so that the ratio  $A = \tau_a/\tau_m \in [0.1-100]$ , and finally with spheroid sizes  $R \sim 100 \mu\text{m}$ , and proliferative tissue timescale  $\tau_t \sim [4-500]$  s, the ratio  $j = \tau_g/\tau_t \in [0.002-0.25]$ .

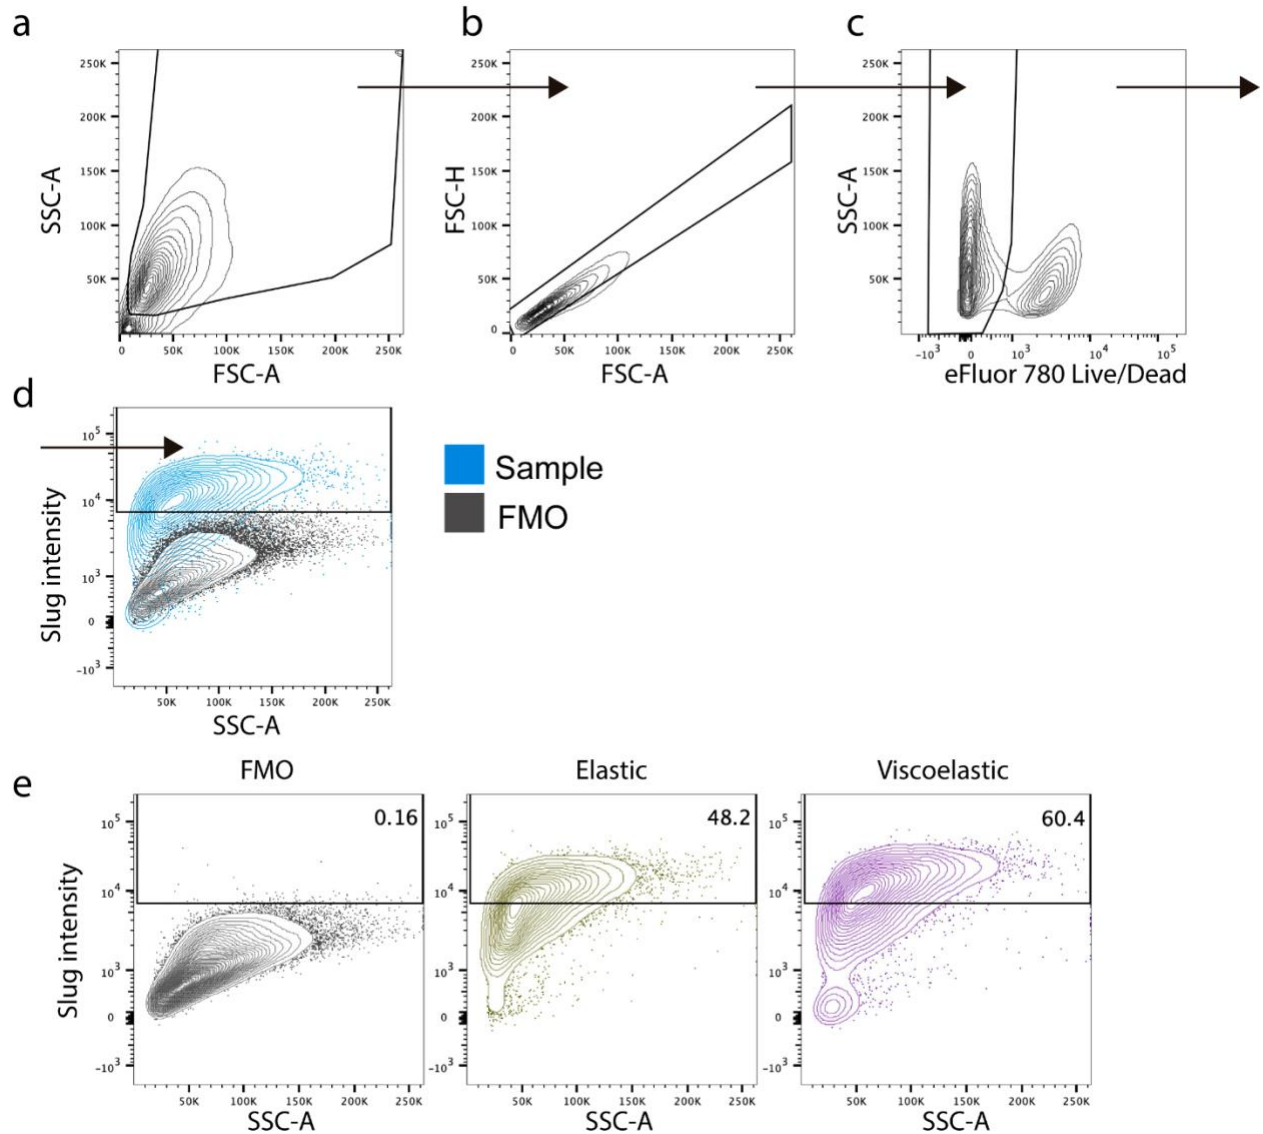

**Supplementary Figure 1. Representative example of flow cytometry experiments.** a-e, Representative gating strategy for Slug-expressing cells collected from alginate gels. Samples were gated for single (a-b), live cells (c) and Slug-expressing cells were identified using a fluorescence minus one (FMO) control (d). e-g, spheroids were cultured in elastic or viscoelastic alginate gels for 5 days and collected following gel digestion. Expression of EMT regulators was assessed through intracellular flow cytometry. f, Representative flow cytometry plots are shown for Slug expression.

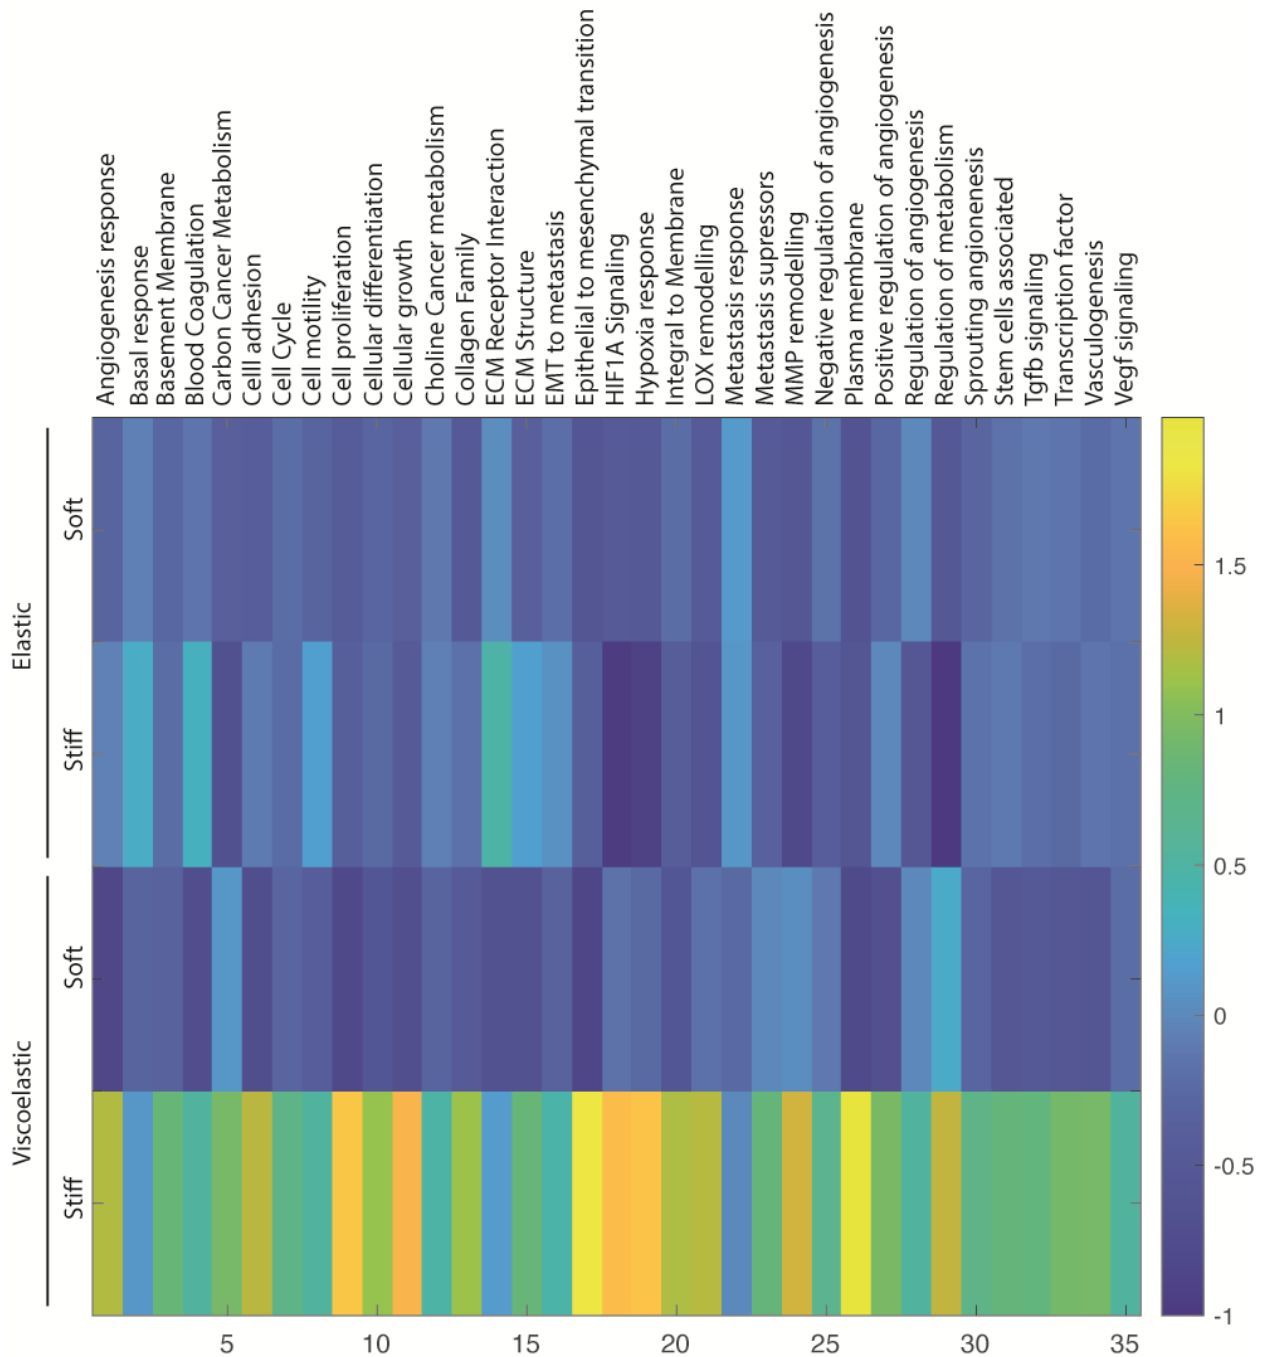

**Supplementary Figure 2. Cancer pathway is upregulated in stiff viscoelastic matrices.** Results of the regulation of cancer-related pathways after the analysis of the expression levels of 770 genes included in the Nanostring PanCancer Progression panel for spheroids in the matrices described.

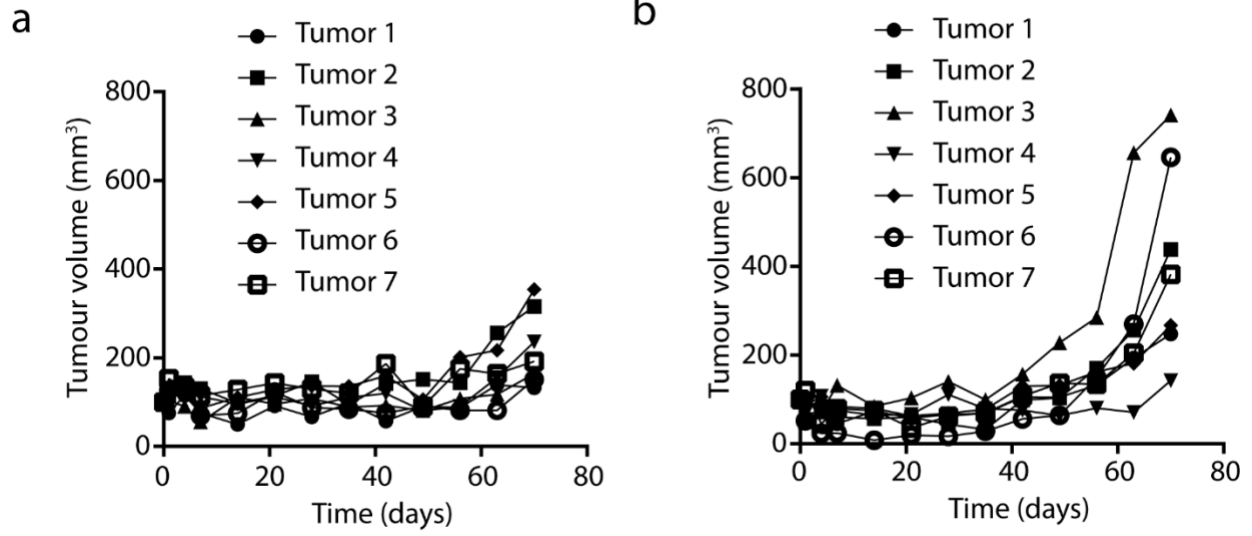

**Supplementary Figure 3. Viscoelasticity increases tumor growth in mice.** **a-b**, Quantification of MDA-MB-231 tumor volume evolution in NOD/SCID mice. MDA-MB-231 cells encapsulated in elastic (**a**) and viscoelastic (**b**) alginate gels were injected subcutaneously into mouse flanks and tumor growth was tracked externally using calipers. Each curve represents an independent tumor/mouse.

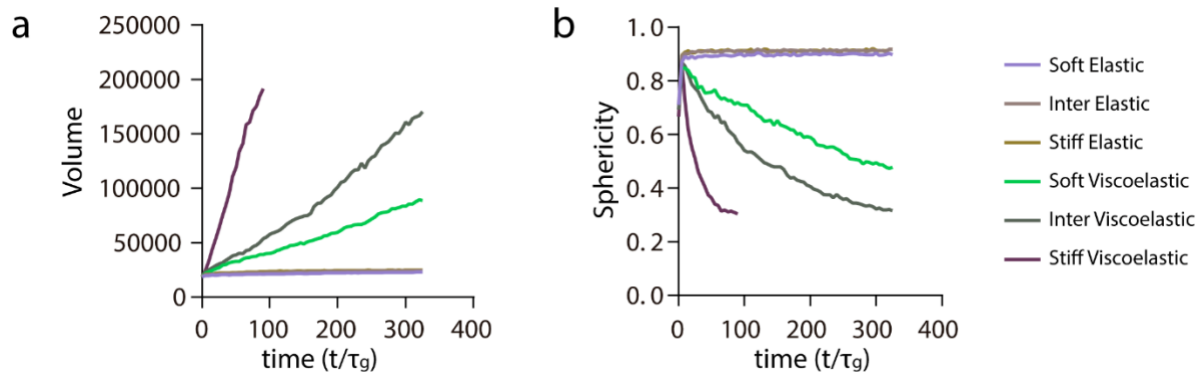

**Supplementary Figure 4. Model predicts cell volume increase and sphericity decrease with stiffness in viscoelastic matrices.** a-b, Quantification from the simulations of the volume (a) and sphericity (b) of the spheroids, respectively, over time for soft, intermediate and stiff elastic and viscoelastic matrices. The dimensionless parameter in the model for stiff elastic ( $A = \frac{\tau_a}{\tau_m} = 0.4, \mu = \frac{\mu_t}{\mu_m} = 0.002, j = \frac{\tau_g}{\tau_t} = 0.05$ ); intermediate elastic ( $A = \frac{\tau_a}{\tau_m} = 0.13, \mu = \frac{\mu_t}{\mu_m} = 0.002, j = \frac{\tau_g}{\tau_t} = 0.05$ ); soft elastic ( $A = \frac{\tau_a}{\tau_m} = 0.003, \mu = \frac{\mu_t}{\mu_m} = 0.002, j = \frac{\tau_g}{\tau_t} = 0.04$ ); stiff viscoelastic ( $A = \frac{\tau_a}{\tau_m} = 400, \mu = \frac{\mu_t}{\mu_m} = 2, j = \frac{\tau_g}{\tau_t} = 0.22$ ); intermediate viscoelastic ( $A = \frac{\tau_a}{\tau_m} = 133, \mu = \frac{\mu_t}{\mu_m} = 2, j = \frac{\tau_g}{\tau_t} = 0.16$ ); and soft viscoelastic ( $A = \frac{\tau_a}{\tau_m} = 3.3, \mu = \frac{\mu_t}{\mu_m} = 2, j = \frac{\tau_g}{\tau_t} = 0.14$ ) matrices.

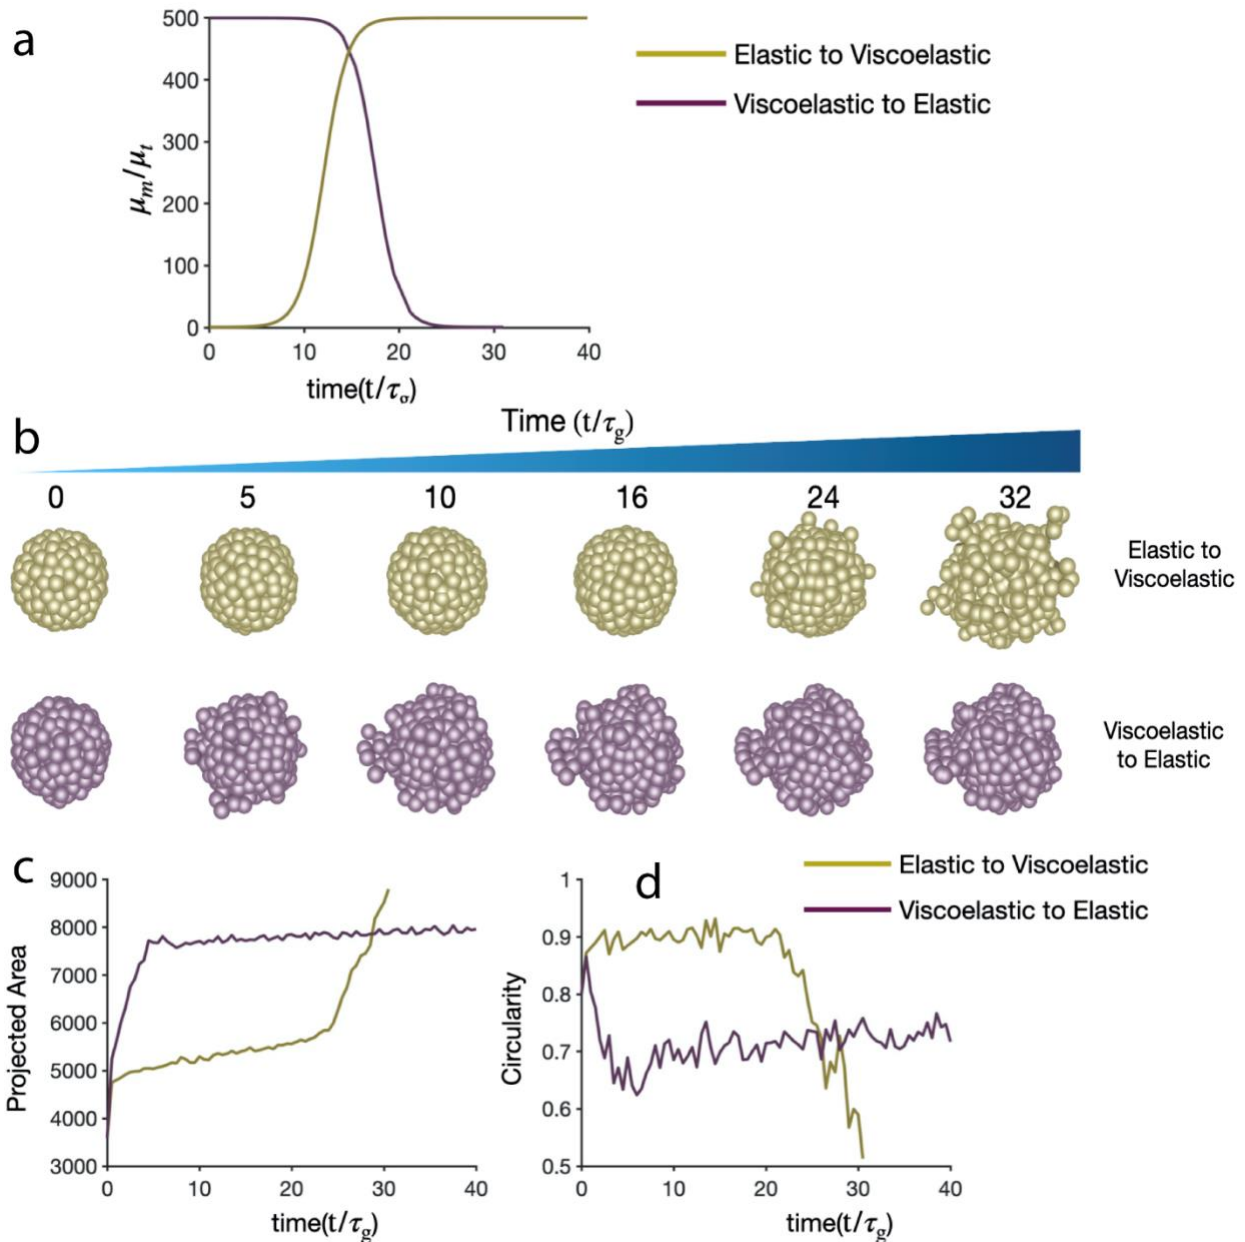

**Supplementary Figure 5. Increasing/Decreasing the viscosity dynamically prevents/facilitates morphological instability** **a**, Showing the change in the substrate to tissue viscosity ratio as a function of time, tissue viscosity has been kept fixed; Two cases have been considered, in the first case the matrix is changing its viscosity from high (elastic) to low (viscoelastic) and in the second case matrix changing its viscosity from low (viscoelastic) to high (elastic) **b**, Images of spheroids from the simulation where the viscosity of the matrix is changing dynamically over time from elastic to viscoelastic (top row) and from viscoelastic to elastic (bottom row) **c-d**, Simulation prediction of projected area (**c**) and circularity (**d**) evolution over time of spheroids while the viscosity of the matrix is changing dynamically. The corresponding dimensionless parameter in the model for the intermediate stiff matrix in the elastic and

viscoelastic limit are  $\left(A = \frac{\tau_a}{\tau_m} = 0.017, \mu = \frac{\mu_t}{\mu_m} = 0.002, j = \frac{\tau_g}{\tau_t} = 0.05\right)$  and  $\left(A = \frac{\tau_a}{\tau_m} = 133, \mu = \frac{\mu_t}{\mu_m} = 2, j = \frac{\tau_g}{\tau_t} = 0.16\right)$ , respectively.



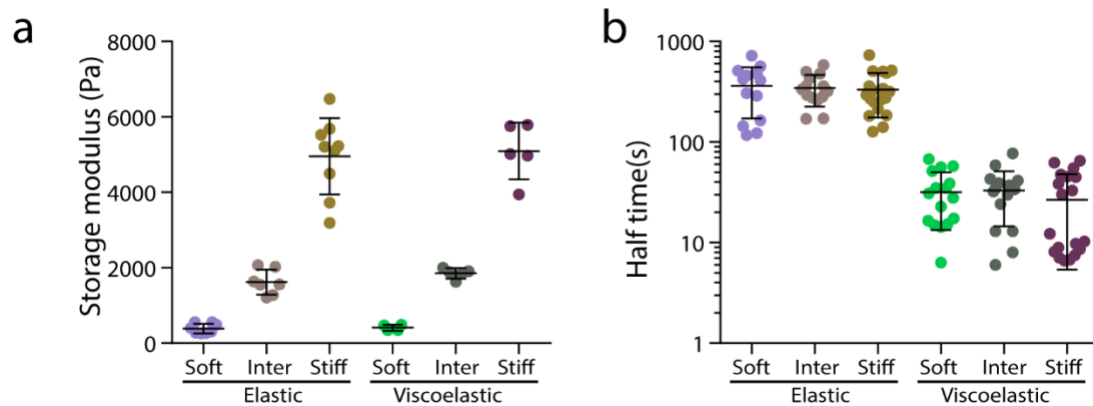

**Supplementary Figure 6. Quantification of hydrogel mechanical properties.** **a**, Quantification of the storage modulus of alginate hydrogels.  $n=8,4,5,7,9,5$  gels per condition. **c**, Quantification of the timescale at which an initially applied stress is relaxed to half its original value.  $n=13,14,19,16,16,19$  gels per condition. Error bars are s.d.

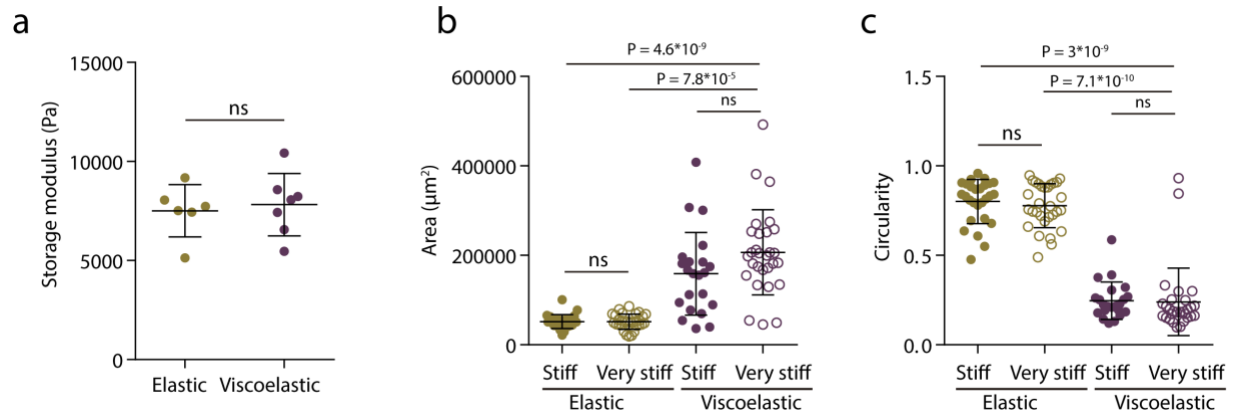

**Supplementary Figure 7. Quantification of spheroids response to stiffer hydrogels.** **a**, Quantification of the storage moduli of alginate hydrogels.  $n=6,7$  gels per condition. Statistical analysis was performed using Mann-Whitney U-test. **b-c**, quantification of spheroids area (**b**) and circularity (**c**) in different stiffness inelastic and viscoelastic hydrogels.  $n= 27,30,22,29$  spheroids per condition. Statistical analysis was performed using Kruskal–Wallis test followed by post hoc Dunn’s test. All data represent mean  $\pm$  s.d.

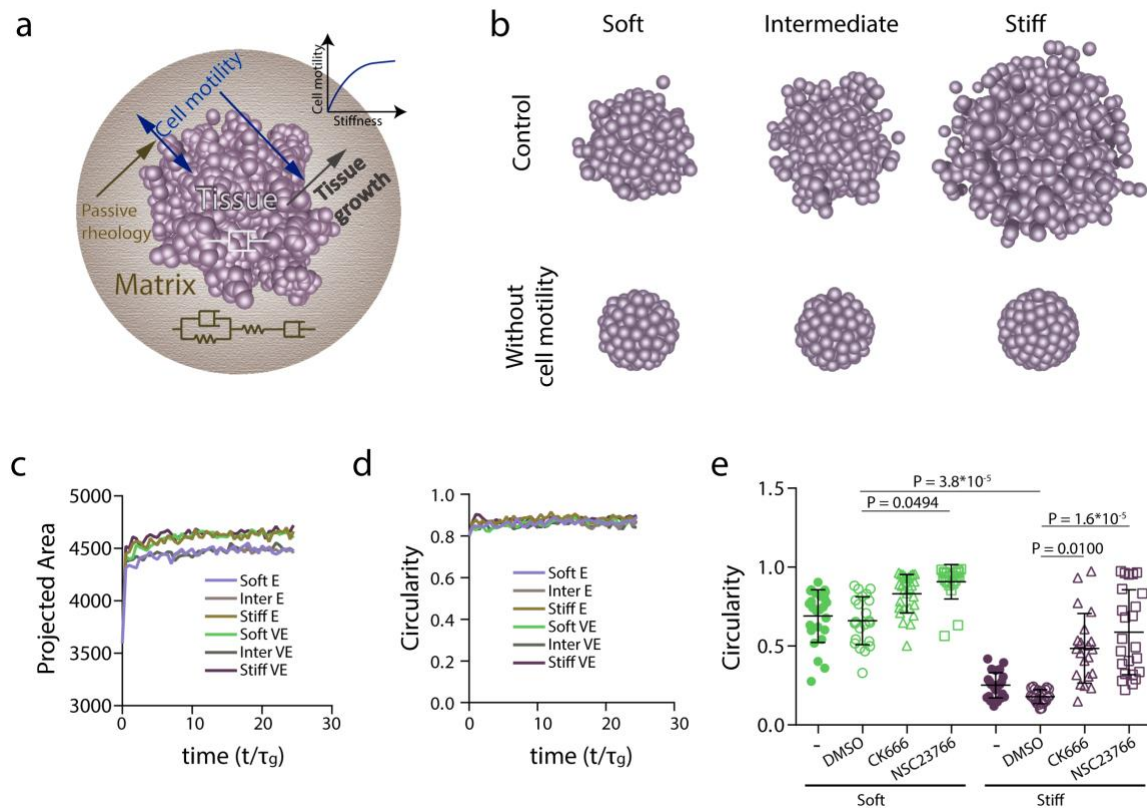

**Supplementary Figure 8. Inhibition of cell motility prevents morphological instability, independent of gel stiffness.** **a**, The influence of eliminating cell motility, in gels with varying stiffness, was simulated in the model. **b**, Images of spheroids, from final timepoint of simulation, in increasingly stiff viscoelastic gels in control case (upper row) and when cell motility was suppressed (lower row). **c-d**, Simulation prediction of projected area (**c**) and circularity (**d**) evolution over time of spheroids in increasingly stiff viscoelastic and elastic gels when cell motility was suppressed (lower row). The dimensionless parameter in the model for stiff elastic ( $A = \frac{\tau_a}{\tau_m} = 0.03, \mu = \frac{\mu_t}{\mu_m} = 0.002, j = \frac{\tau_g}{\tau_t} \sim 0$ ); intermediate elastic ( $A = \frac{\tau_a}{\tau_m} = 0.017, \mu = \frac{\mu_t}{\mu_m} = 0.002, j = \frac{\tau_g}{\tau_t} \sim 0$ ); soft elastic ( $A = \frac{\tau_a}{\tau_m} = 0.0017, \mu = \frac{\mu_t}{\mu_m} = 0.002, j = \frac{\tau_g}{\tau_t} \sim 0$ ); stiff viscoelastic ( $A = \frac{\tau_a}{\tau_m} = 33.3, \mu = \frac{\mu_t}{\mu_m} = 2, j = \frac{\tau_g}{\tau_t} \sim 0$ ); intermediate viscoelastic ( $A = \frac{\tau_a}{\tau_m} = 16.7, \mu = \frac{\mu_t}{\mu_m} = 2, j = \frac{\tau_g}{\tau_t} \sim 0$ ); and soft viscoelastic ( $A = \frac{\tau_a}{\tau_m} = 1.7, \mu = \frac{\mu_t}{\mu_m} = 2, j = \frac{\tau_g}{\tau_t} \sim 0$ ) matrices. **e**, Quantification of spheroids circularity after 5 days in soft and stiff viscoelastic matrices with Arp2/3 (CK666) and Rac1 (NSC23766) inhibitors.  $n=24,21,21,24,25,22,27,21$  spheroids per condition. Statistical analysis was performed using Kruskal–Wallis test followed by post hoc Dunn’s test. All data represent mean  $\pm$  s.d.

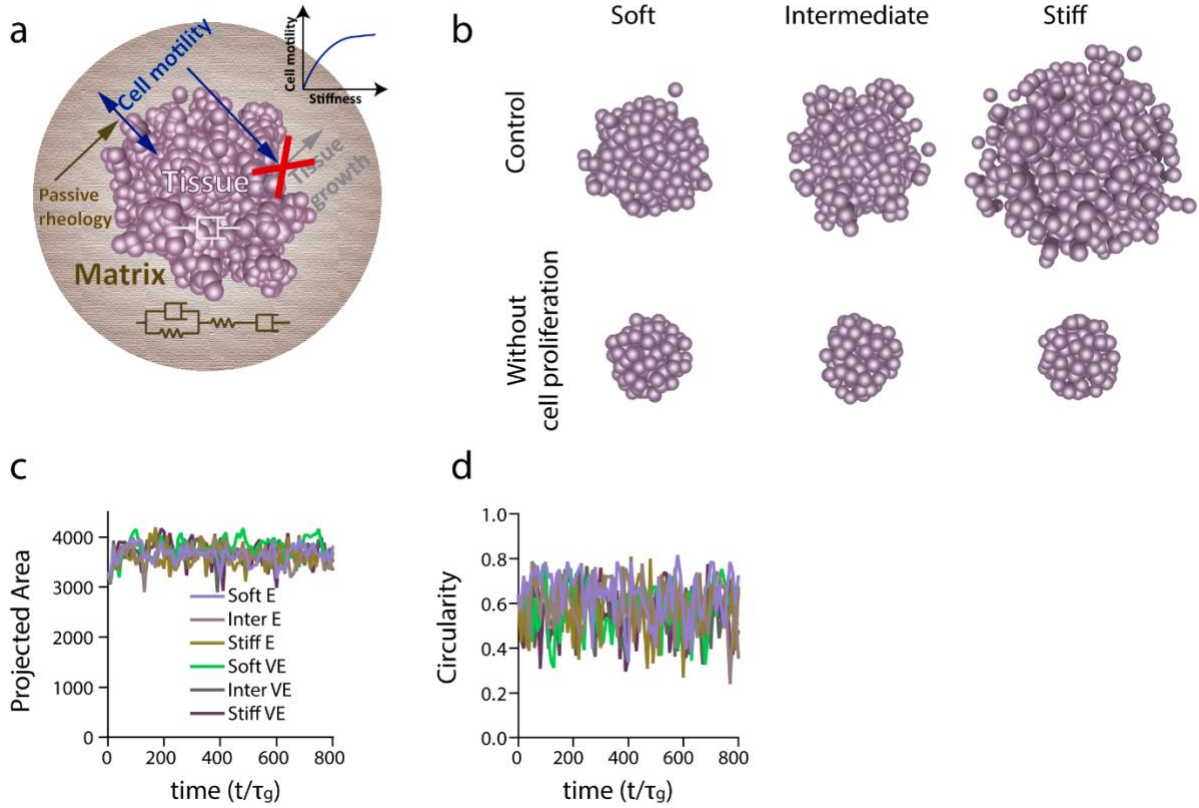

**Supplementary Figure 9. Inhibition of cell proliferation prevents morphological instability independently of the gel stiffness.** **a**, the influence of eliminating cell proliferation, in gels of increasing stiffness, was simulated in the model. **b**, Images of spheroids, from final timepoint of simulation, in increasingly stiff viscoelastic gels in control case (upper row) and when cell proliferation was inhibited. **c-d**, Simulation prediction of projected area (**c**) and circularity (**d**) evolution over time of spheroids in increasingly stiff elastic and viscoelastic gels when cell proliferation was suppressed. The dimensionless parameter in the model for stiff elastic ( $A = \frac{\tau_a}{\tau_m} = 0.4, \mu = \frac{\mu_t}{\mu_m} = 0.002, j = \frac{\tau_g}{\tau_t} = 0$ ); inter elastic ( $A = \frac{\tau_a}{\tau_m} = 0.13, \mu = \frac{\mu_t}{\mu_m} = 0.002, j = \frac{\tau_g}{\tau_t} = 0$ ); soft elastic ( $A = \frac{\tau_a}{\tau_m} = 0.003, \mu = \frac{\mu_t}{\mu_m} = 0.002, j = \frac{\tau_g}{\tau_t} = 0$ ); stiff viscoelastic ( $A = \frac{\tau_a}{\tau_m} = 400, \mu = \frac{\mu_t}{\mu_m} = 2, j = \frac{\tau_g}{\tau_t} = 0$ ); inter viscoelastic ( $A = \frac{\tau_a}{\tau_m} = 133.3, \mu = \frac{\mu_t}{\mu_m} = 2, j = \frac{\tau_g}{\tau_t} = 0$ ); and soft viscoelastic ( $A = \frac{\tau_a}{\tau_m} = 3.33, \mu = \frac{\mu_t}{\mu_m} = 2, j = \frac{\tau_g}{\tau_t} = 0$ ) matrices.

a

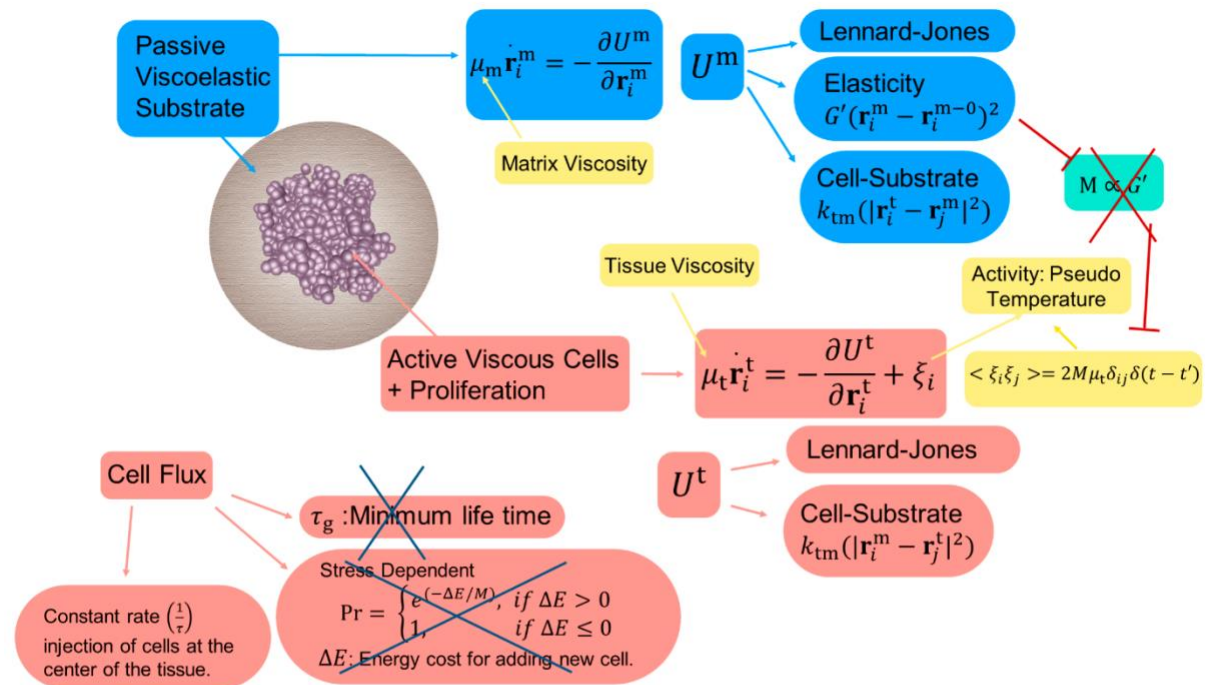

b

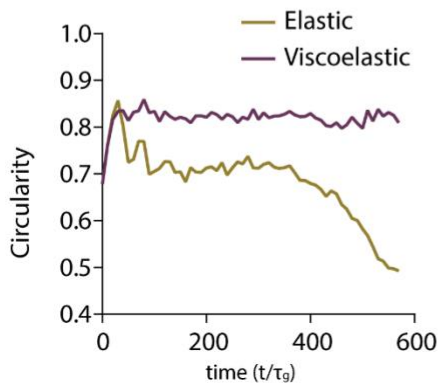

**Supplementary Figure 10. a, 3D model for cell flux driven simulations.** The texts in light blue/light red color boxes describe the matrix/cell property and interactions therein. The yellow boxes represent the parameters which we vary to probe the phase space of morphologies. The cells are being injected at the center of the tissue to mimic the experiments and hence the proliferation is independent of the stress. Now motility is not a function of stiffness and its value has been chosen to be very small. **b,** Quantification from the simulations of the circularity of the spheroids.

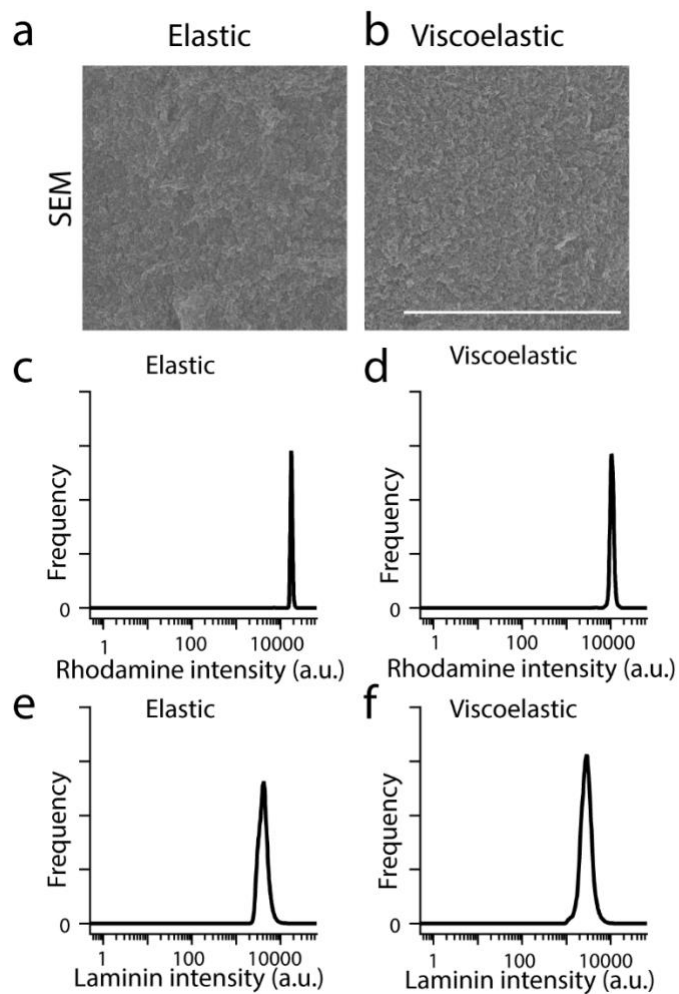

**Supplementary Figure 11. Alginate-matrigel interpenetrating networks are homogeneous without micro-scale phase separation.** **a-b**, Representative scanning electron micrographs, of an alginate-matrigel matrix for the (a) elastic and the (b) viscoelastic condition. There is no phase separation.  $n > 30$  images per condition. **c-d**, Representative histograms of fluorescent alginate of an (c) elastic and (d) viscoelastic interpenetrating matrix. **e-f**, Representative histograms of laminin staining of an (e) elastic and (f) viscoelastic interpenetrating matrix. The presence of alginate and laminin staining in each pixel demonstrates that these two networks are interpenetrating at this scale. Scale bar is 10  $\mu\text{m}$ .

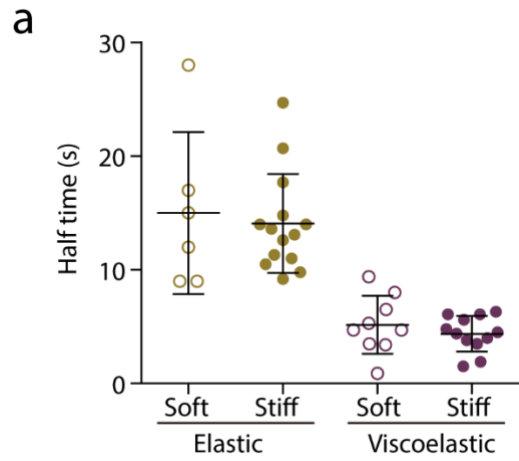

**Supplementary Figure 12. Stresses relax faster in interpenetrating networks polymerized with lower molecular weight alginate. a,** Half time of alginate-matrigel interpenetrating networks. n=6,14,9,12 gels per condition. Data represent mean  $\pm$  s.d.

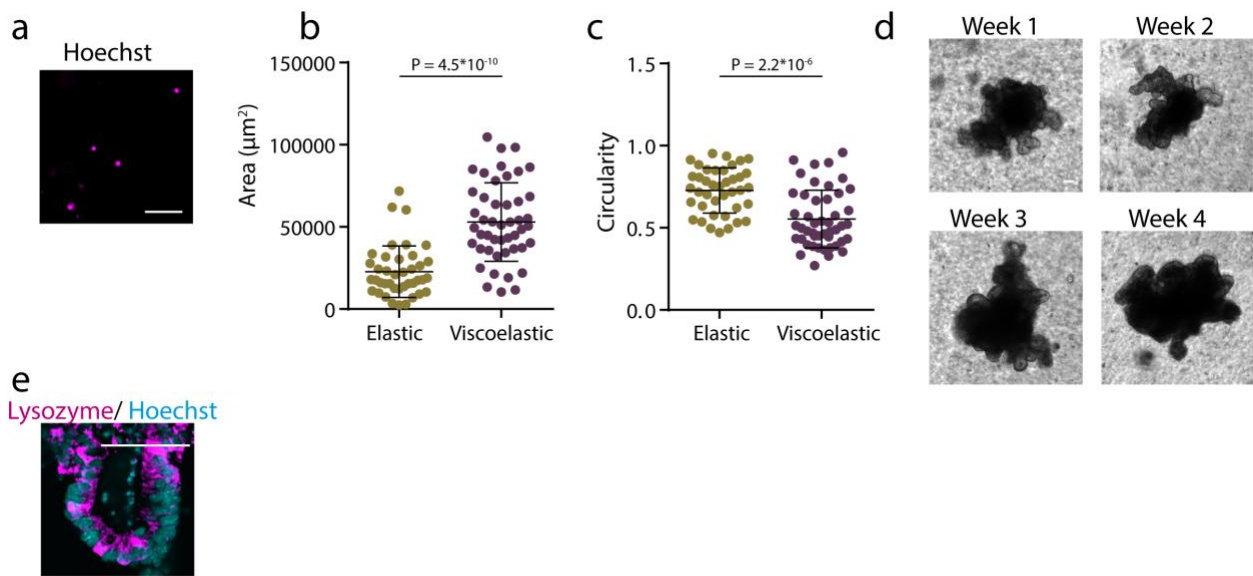

**Supplementary Figure 13. Single cells form organoids in interpenetrating alginate and Matrigel networks.** **a**, Single cells were encapsulated in interpenetrating networks.  $n = 11$  images. **b-c**, Quantification of organoids area (**c**) and circularity (**d**) after 7 days in elastic and viscoelastic interpenetrating networks. **b-c**,  $n = 40, 47$  organoids per condition. Statistical analysis was performed using two-sided Mann-Whitney U-test. **d**, Organoids were passed, broken down to single cells and encapsulated in new interpenetrating networks every 7 days.  $n > 25$  images per condition. **e**, After one month of passaging, Paneth cells were visualized by lysozyme staining.  $n = 6$  images. Data represent mean  $\pm$  s.d. Scale bars are  $50 \mu\text{m}$ .



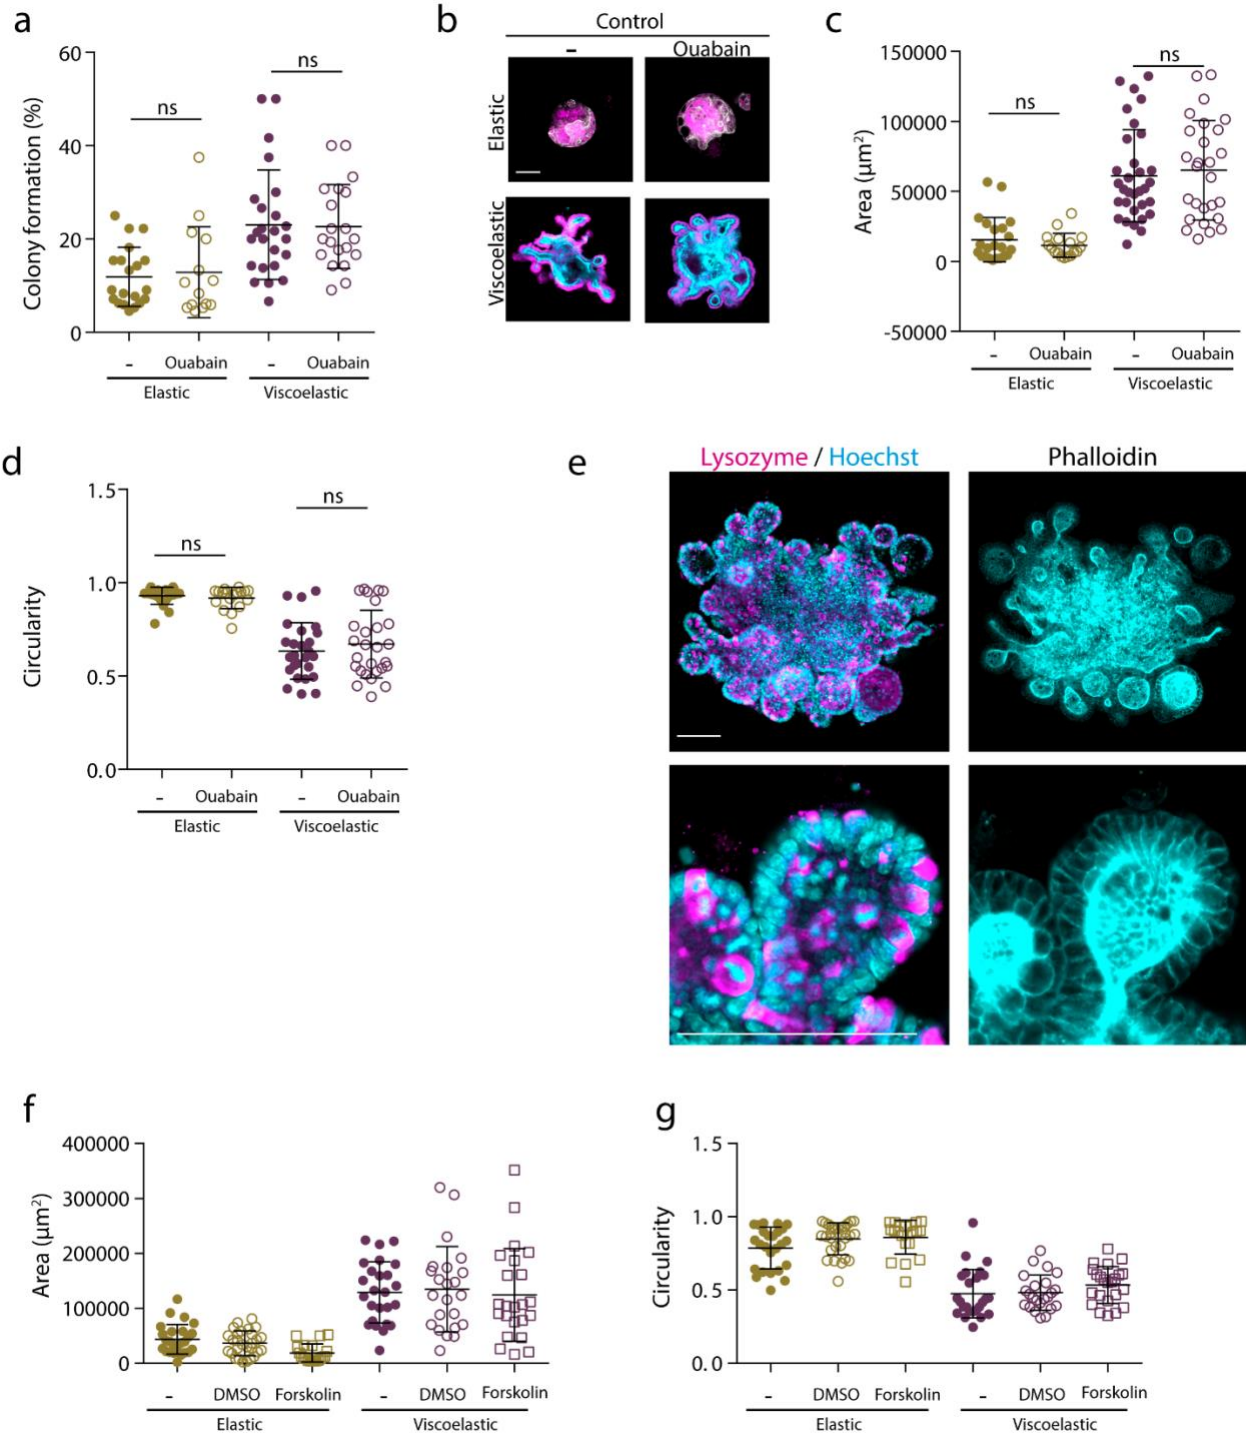

**Supplementary Figure 14. Organoids grow, develop and pattern similarly in the presence of ouabain. a,** Quantification of the percentage of cells which form colonies in gels after 7 days with or without ouabain. **b-d,** Representative examples (**b**) and quantification of organoids area (**c**) and circularity (**d**) after 7 days with or without ouabain in the culture medium.  $n=22,17,32,27$  **b,c** /  $20,14,24,20$  **d** organoids per condition. Statistical analysis was performed using Kruskal–Wallis test followed by post hoc Dunn’s test. **e,** Representative examples of Lysozyme, Hoechst and phalloidin stainings of organoids with ouabain.

Lysozyme (magenta) and Hoechst (cyan) in the left and phalloidin (cyan) in the right. Higher magnification images are provided on bottom row. **e-f**, Quantification of organoids area (**e**) and circularity (**f**) after 7 days with or without forskolin in the culture medium. n=25,28,20,25,23,20 organoids per condition. Statistical analysis was performed using Kruskal–Wallis test followed by post hoc Dunn’s test. All data represent mean  $\pm$  s.d., all scale bars are 100  $\mu$ m.

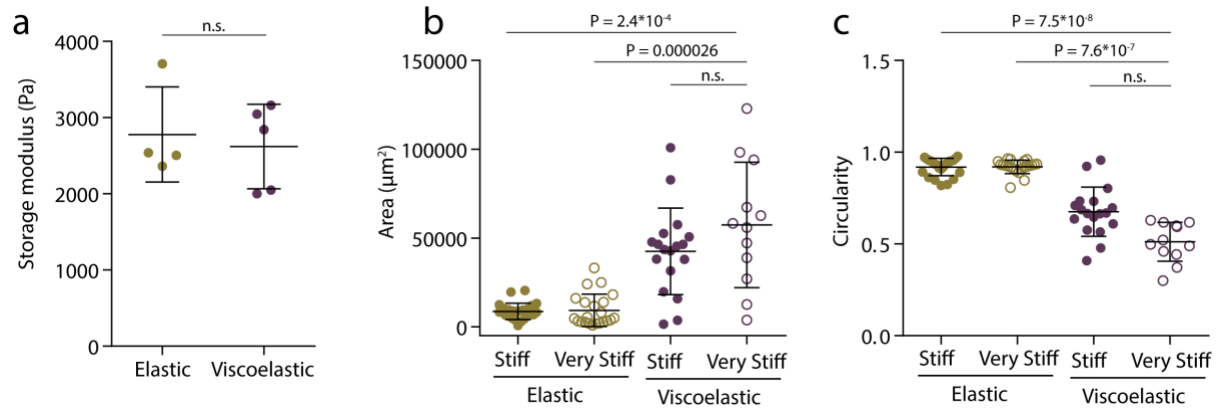

**Supplementary Figure 15. Organoids morphological instability increases with stiffness in alginate-matrigel interpenetrating networks (IPN).** **a**, Storage moduli of the elastic and viscoelastic alginate-matrigel IPNs.  $n=4,5$  hydrogels per condition. Statistical analysis was performed using two-sided Mann-Whitney U-test. **b-c**, Quantification of the area (**b**) and circularity (**c**) of organoids in different stiffness elastic and viscoelastic matrices. **b-c**,  $n=24,22,18,12$ . Statistical analysis was performed using Kruskal-Wallis test followed by post hoc Dunn's test. All data represent mean  $\pm$  s.d.

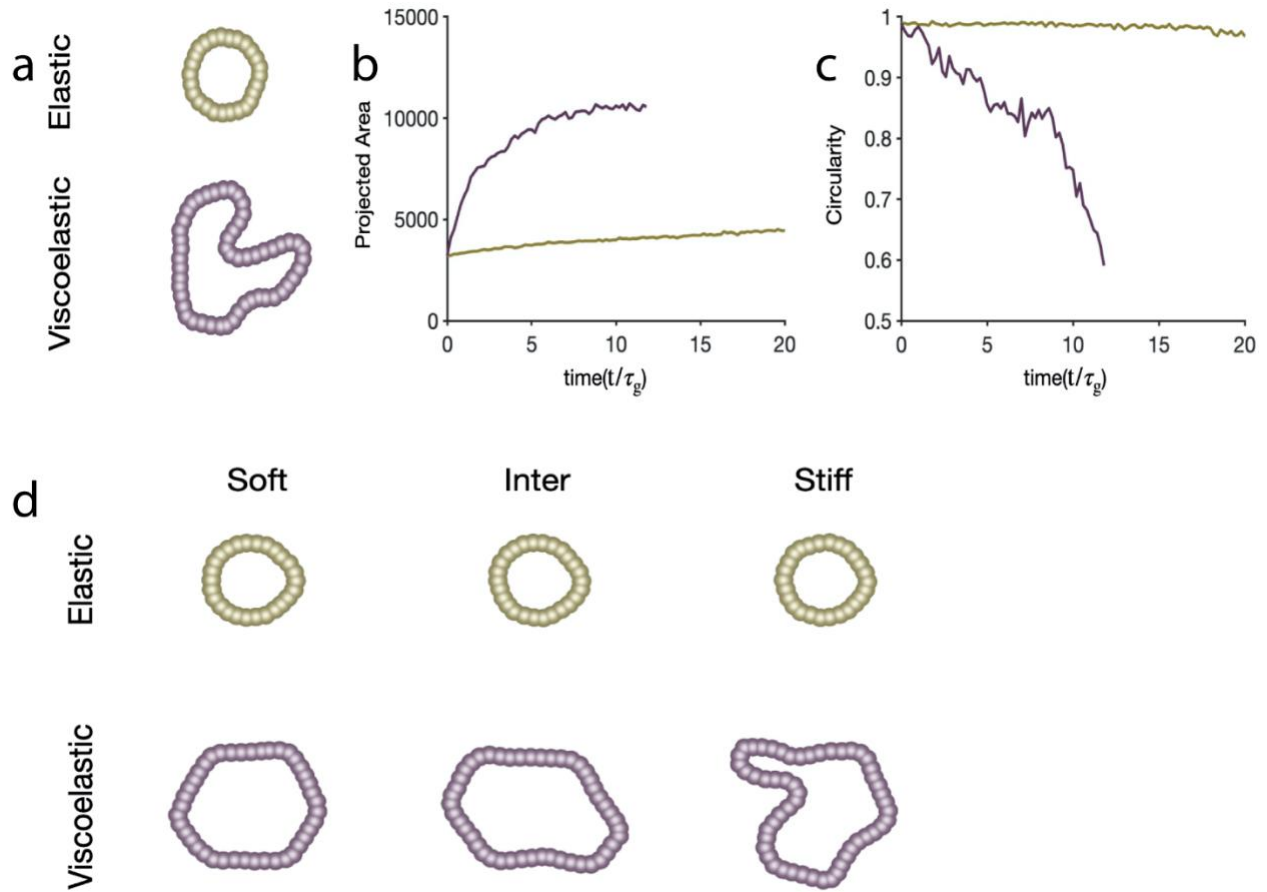

**Supplementary Figure 16. Model Prediction: Organoids grow, break symmetry and form buds in viscoelastic matrices.** **a**, Images of simulated organoids at time ( $t = 12\tau_g$ ) in stiff elastic and viscoelastic matrices. **b-c**, Simulation prediction of projected area (**b**) and circularity (**c**) evolution over time of organoids for the six matrix conditions. **d**, Images of simulated organoids at time ( $t = 12\tau_g$ ) with increasing stiffness in elastic matrices (top row) versus viscoelastic matrices (bottom row)

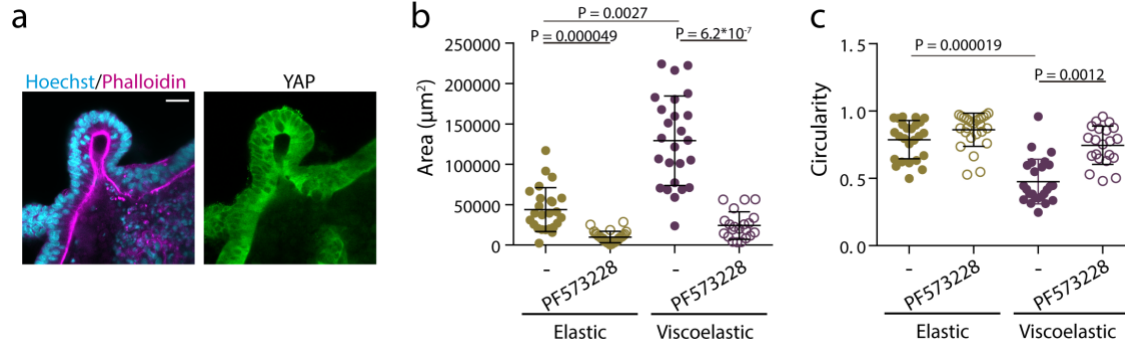

**Supplementary Figure 17. Influence of YAP nuclear translocation and FAK in organoids development.**

**a**, Representative examples of phalloidin, Hoechst (left) and YAP (right) stainings of organoids in viscoelastic gels. **b-c**, Quantification of area (**b**) and circularity (**c**) in organoids in elastic and viscoelastic hydrogels without or with PF573228 (FAK inhibitor).  $n=25,26,25,21$  organoids per condition. Statistical analysis was performed using Kruskal–Wallis test followed by post hoc Dunn’s test. Scale bar is  $20 \mu\text{m}$ . All data represent mean  $\pm$  s.d.

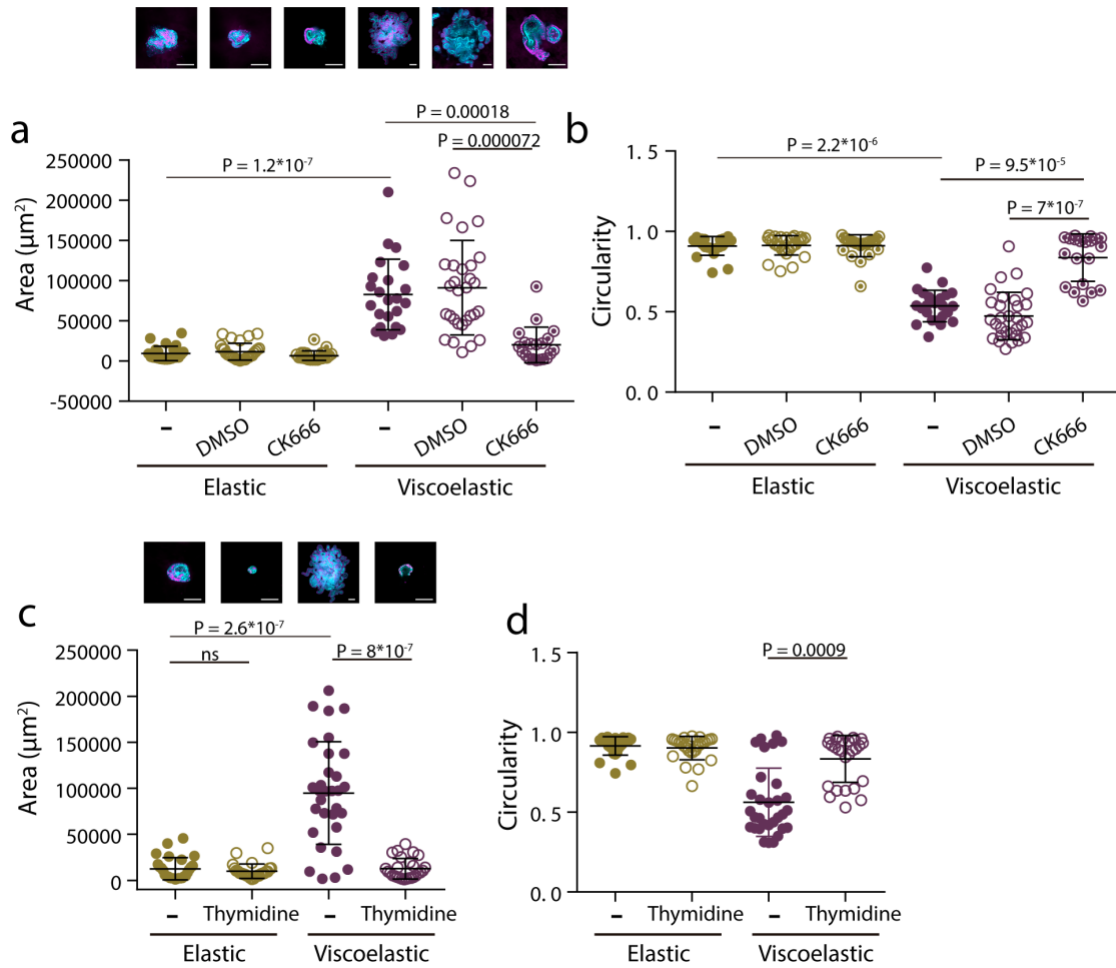

**Supplementary Figure 18. Arp2/3 and cell proliferation regulate organoid growth and symmetry breaking.** **a-b**, Representative examples and quantification of organoids (a) area and (b) circularity after 7 days in elastic and viscoelastic matrices with Arp2/3 (CK666) inhibitor.  $n = 23, 28, 23, 23, 30, 20$  organoids per condition. **c-d**, Representative examples and quantification of organoids (c) area and (d) circularity in elastic and viscoelastic matrices with thymidine.  $n = 27, 26, 31, 27$  organoids per condition. Statistical analysis was performed using Kruskal–Wallis test followed by post hoc Dunn’s test. Scale bars are 100  $\mu\text{m}$ . All data represent mean  $\pm$  s.d.

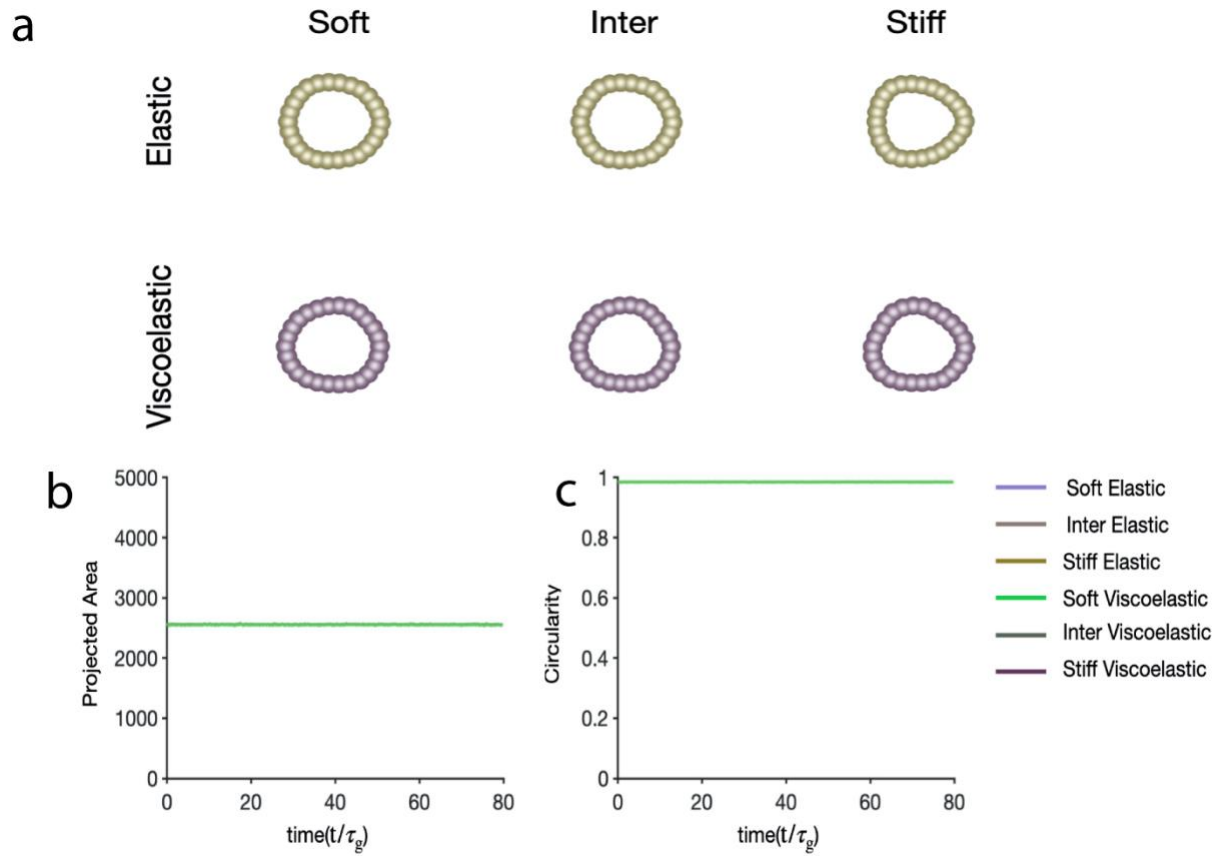

**Supplementary Figure 19. Inhibition of cell motility prevents morphological instability, independently of the matrix viscoelasticity and stiffness.** **a**, Images of simulated organoids at time ( $t = 80\tau_g$ ) with increasing stiffness in elastic matrices (top row) versus viscoelastic matrices (bottom row) **b-c**, Simulation prediction of projected area (**b**) and circularity (**c**) evolution over time of organoids for the six matrix conditions.

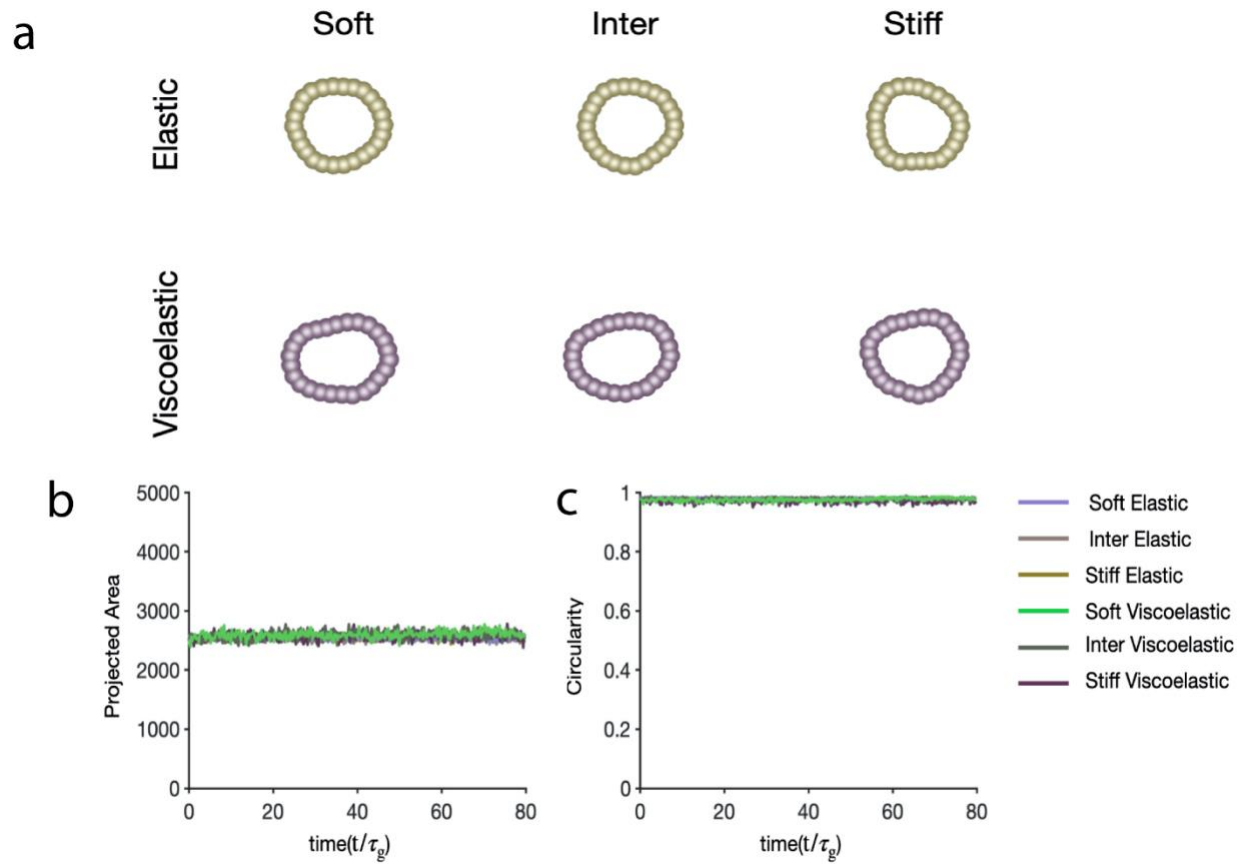

**Supplementary Figure 20. Inhibition of cell proliferation prevents morphological instability independently of the matrix viscoelasticity and stiffness.** **a**, Images of simulated organoids at time ( $t = 80\tau_g$ ) with increasing stiffness in elastic matrices (top row) versus viscoelastic matrices (bottom row) **b-c**, Simulation prediction of projected area (**b**) and circularity (**c**) evolution over time of organoids for the six matrix conditions.



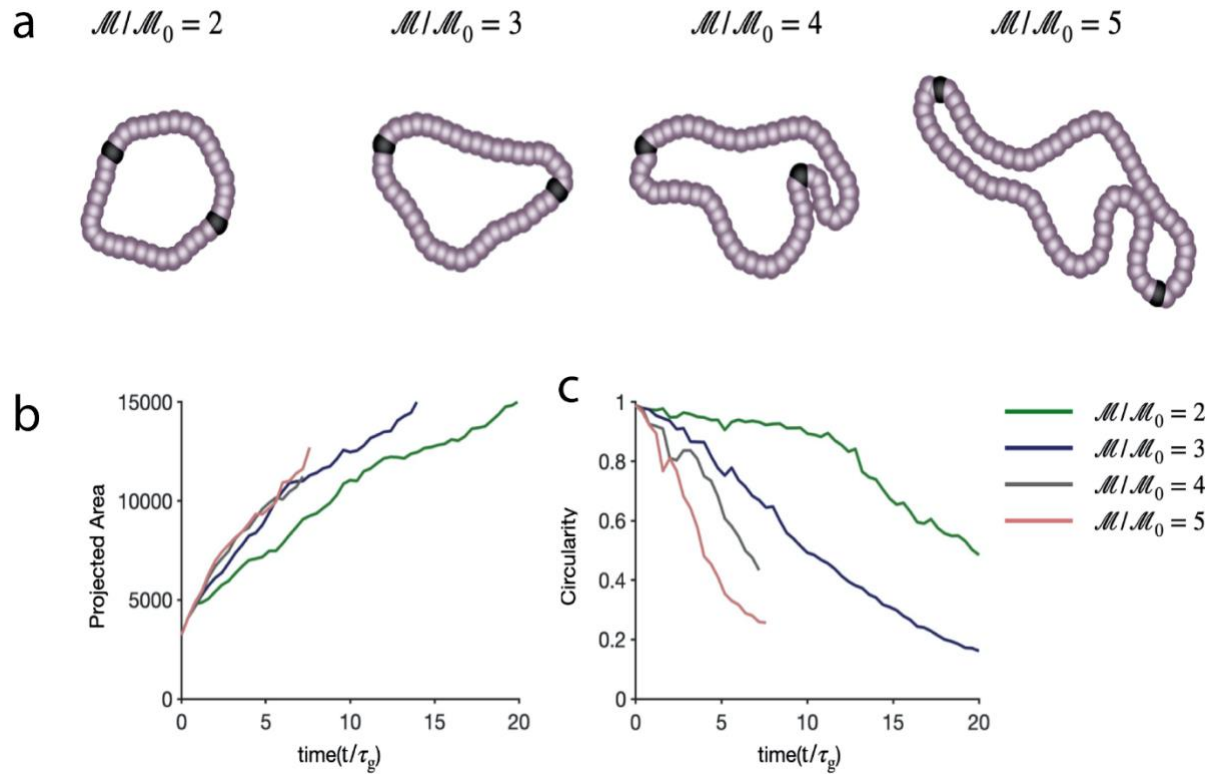

**Supplementary Figure 21. Differential motility of cells in organoids affects the growth, symmetry breaking and budding of organoid.** Black Cells have higher motility compare to the rest of the cells in the organoid **a**, Images of simulated organoids at time ( $t \sim 8\tau_g$ ) from left to right with increasing motility of the black cells in soft viscoelastic matrices **b-c**, Simulation prediction of projected area (**b**) and circularity (**c**) evolution over time of organoids with increasing motility of the black cells.

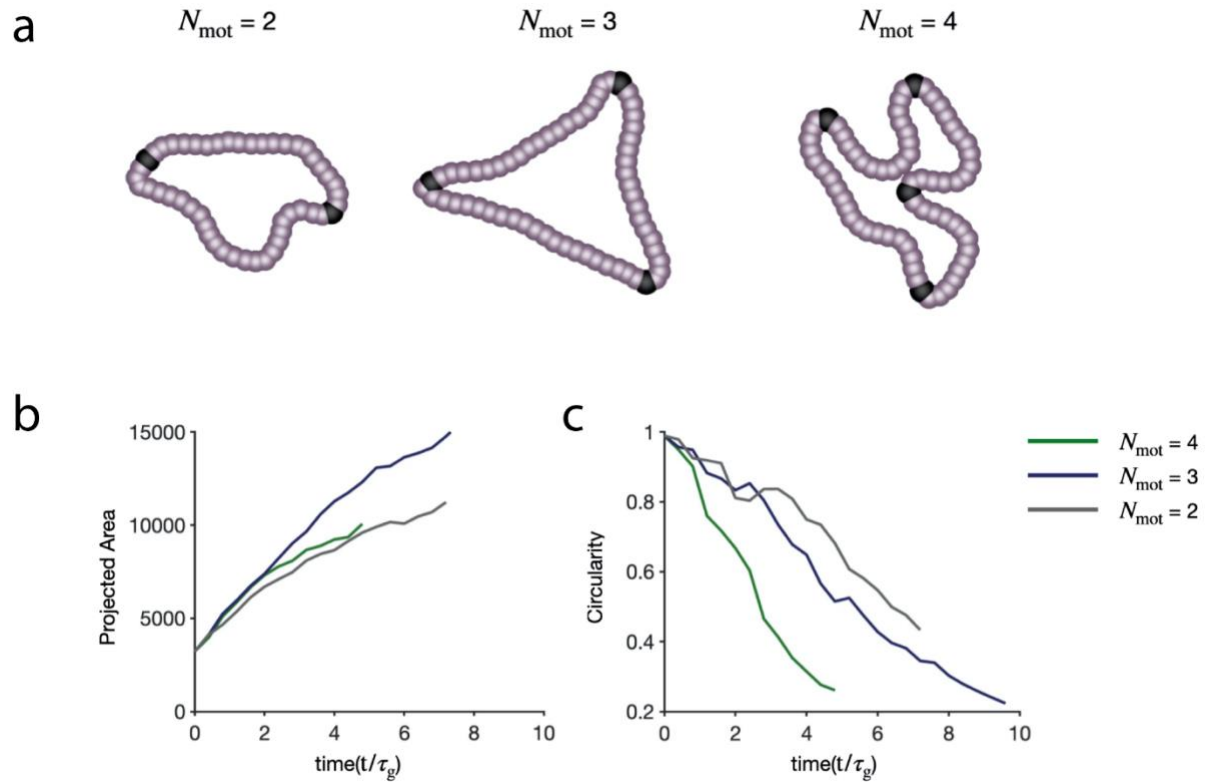

**Supplementary Figure 22. Location of cell with differential motility is correlated with the location of symmetry breaking.** **a**, Images of simulated organoids at time ( $t \sim 5\tau_g$ ) from left to right with increasing number of differentiated cells with relatively higher motility (shown in black) in soft viscoelastic matrices. **b-c**, Simulation prediction of projected area (**b**) and circularity (**c**) evolution over time of organoids with increasing number of differentiated cells with relatively higher motility.

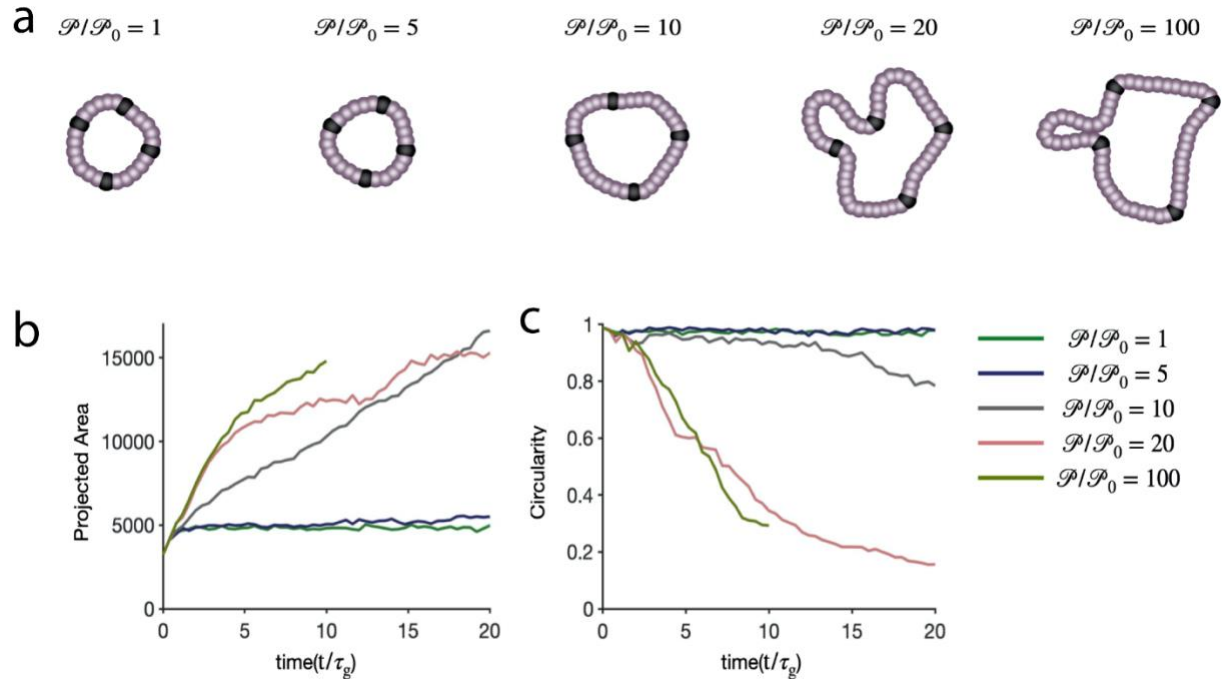

**Supplementary Figure 23. Differential proliferation of cells in organoids affects the growth, symmetry breaking and budding of organoid.** **a**, Images of simulated organoids at time ( $t \sim 10\tau_g$ ) from left to right with increasing degree proliferation of differentiated cells (shown in black) in soft viscoelastic matrices **b-c**, Simulation prediction of projected area (**b**) and circularity (**c**) evolution over time of organoids with increasing proliferation of differentiated cells.

Supplementary Video S1: Examples of spheroids growth in elastic (left) and viscoelastic (right) matrices.

Supplementary Video S2: Examples of simulated tissue growth in elastic (left) and viscoelastic (right) matrices.

Supplementary Video S3: Examples of simulated tissue growth when cell motility is inhibited in elastic (left) and viscoelastic(right) matrices.

Supplementary Video S4: Examples of simulated tissue growth when cell proliferation is inhibited in elastic (left) and viscoelastic(right) matrices.

Supplementary Video S5: Examples of simulated tissue growth in elastic (upper row) and viscoelastic (lower row) in matrices of increasing stiffness.

Supplementary Video S6: Examples of simulated tissue growth when cell migration is inhibited in elastic (upper row) and viscoelastic (lower row) in matrices of increasing stiffness.

Supplementary Video S7: Examples of simulated tissue growth when cell proliferation is inhibited in elastic (upper row) and viscoelastic (lower row) in matrices of increasing stiffness.

Supplementary Video S8: Example of simulated tissue growth when cells are continuously added to the tissue in elastic (left) and viscoelastic (right) matrices.

Supplementary Video S9: Example of simulated tissue growth when the matrix property changes from elastic to viscoelastic.

Supplementary Video S10: Example of simulated tissue growth when the matrix property changes from viscoelastic to elastic.

Supplementary Video S11: Examples of simulated organoid tissue growth in elastic (upper row) and viscoelastic (lower row) in matrices of increasing stiffness.

Supplementary Video S12: Examples of simulated organoid tissue growth in viscoelastic matrices where two black cells have higher motility ( $\mathcal{M}$ ) compared to the rest ( $\mathcal{M}_0$ ).

Supplementary Video S13: Examples of simulated organoid tissue growth in viscoelastic matrices where an increasing number of cells (black) have 4 times higher motility compared to the rest.

Supplementary Video S14: Examples of simulated organoid tissue growth in viscoelastic matrices where four black cells have an increasing probability ( $\mathcal{P}$ ) to divide compared to the rest ( $\mathcal{P}_0$ ).

1 **Theoretical model**

2 In our experiments, a tissue comprised of motile, proliferating cells is initially encapsulated in a viscoelastic  
 3 gel. Both the passive matrix and active cells are modeled using interacting soft spherical particles of size  
 4  $a$  subject to forces with appropriate Langevin dynamics. Initially, a collection of motile proliferating cells  
 5 is surrounded by a passive set of particles representing the extracellular matrix. Cells are assumed to be  
 6 active with a random movement analogous to a Brownian particle, but this movement is not related to  
 7 temperature of the environment and is instead due to the active nature of the cell<sup>1,2</sup>. The cells also repel  
 8 each other with a short-range force and also repel the matrix to avoid the overlap. The equation of motion  
 9 for a cell with coordinate  $\mathbf{r}_i^t$  is:

10 
$$\mu_t \dot{\mathbf{r}}_i^t = -\frac{\partial U^t}{\partial \mathbf{r}_i^t} + \boldsymbol{\xi}_i(t)$$

11 where  $\mu_t$  is the tissue viscous friction,  $U^t$  is the interaction potential for the cells, and  $\boldsymbol{\xi}(t)$  is random force  
 12 with zero mean and a variance related to its activity, i.e.  $\langle \boldsymbol{\xi}(t) \rangle = 0$ ;  $\langle \xi_{i,\alpha}(t) \xi_{i,\beta}(t') \rangle =$   
 13  $2 \mathcal{M} \mu_t \delta(t - t') \delta_{\alpha\beta}$ . The viscous friction is a result of the interaction of cells with the extra-cellular matrix  
 14 (ECM). Assumed that the inertial effects are negligible and hence considered an overdamped motion. The  
 15 interaction potential for the cells,  $U^t$  has two contributions:

16 
$$U^t(\mathbf{x}) = \frac{1}{2} \sum_j \sum_{i \neq j} u_{ij}^t + \frac{1}{2} \sum_k \sum_i u_{ik}^{tm},$$

17 the first one is the interaction between the cells themselves, which we consider having short-range  
 18 repulsion to avoid the overlap and mid-range (two cell size) attraction, and no long-range (greater than  
 19 two cell size) interaction<sup>3</sup> :

20 
$$u_{ij}^t = \begin{cases} \epsilon \left( \left( \frac{a}{r_{ij}} \right)^2 - 1 \right) \left( \left( \frac{r_c}{r_{ij}} \right)^2 - 1 \right)^2 & \text{for } r_{ij} \leq r_c, \\ 0 & \text{for } r_{ij} > r_c \end{cases}$$

21 where  $r_c = 2a$ ; the second one we assume that there is repulsive interaction between the cell and  
 22 matrix of diameter  $a$  to avoid the overlap and that to be harmonic:

$$23 \quad u_{ik}^{\text{tm}} = \begin{cases} k_{\text{tm}} (r_{ik} - a)^2 & \text{for } r_{ik} < a \\ 0 & \text{for } r_{ik} \geq a \end{cases}$$

24 where  $r_{ij} = |\mathbf{r}_j^t - \mathbf{r}_i^t|$  is the distance between the cell  $'i'$  and  $'j'$  and  $r_{ik} = |\mathbf{r}_k^m - \mathbf{r}_i^t|$  is the distance  
 25 between the cell  $'i'$  and matrix bead  $'k'$ . The random force  $\xi_i(t)$  is assumed to be zero-mean and uniformly  
 26 distributed so that:

$$27 \quad \langle \xi_{i,\alpha}(t) \rangle = 0,$$

$$28 \quad \langle \xi_{i,\alpha}(t) \xi_{i,\beta}(t') \rangle = 2 \mathcal{M} \mu_t \delta(t - t') \delta_{\alpha\beta},$$

29 where is the single cell activity/motility and  $\xi_{i,\alpha}$  is the  $x$  or  $y$  or  $z$  component of  $\xi_i$ . By using the result  
 30 from statistical physics<sup>4</sup>, we can relate the microscopic diffusivity of a (Brownian) cell to the activity by the  
 31 relation  $D = \frac{\mathcal{M}}{\mu_t}$ .

32

33 In the model, the cell division has two constraints, a cell can divide only if it is older than a free growth-  
 34 rate time scale  $\tau_g$ , and a cell-division will be acceptable only if it is energetically favorable<sup>5,6</sup>. To decide the  
 35 energetically favorable divisions, we are using a Metropolis-Hastings algorithm, a Markov chain Monte  
 36 Carlo method<sup>7</sup>. At each time step we randomly pick a cell and check for the age of the cell, if the cell is  
 37 older than  $\tau_g$ , it is allowed to divide, the new cell will take space next to the old cell, with an angle which  
 38 is chosen from a uniform random distribution over  $[0 - 2\pi]$ . We calculate the cost of energy  $\Delta E = E_f -$   
 39  $E_o$  to displace the cell and matrix, where  $E_{f/o}$  is the total energy of the cell aggregate and matrix  
 40 after/before cell division. Then we accept this cell division with the probability:

$$P = \begin{cases} \exp\left(-\frac{\Delta E}{\mathcal{M}}\right) & \text{for } \Delta E \geq 0 \\ 1 & \text{for } \Delta E < 0 \end{cases} \quad (1)$$

41

42 To model the matrix phase, we assume that the matrix is made of mono-disperse spherical bead of the  
 43 same size as the cell 'a'. These beads are passive in nature and they get displaced as a reaction to tissue  
 44 activity and pressure applied by the tissue proliferation. The bead moves under the influence of three  
 45 forces: (i) the first arises from the elastic nature of the matrix with elasticity coefficient  $G'$ ; the second  
 46 arises from the interaction between the beads themselves, similar to what we have for the cell-cell  
 47 interaction; and the last arises from the repulsion between the bead and the tissue to avoid the overlap.  
 48 The equation of motion for a bead with coordinate  $\mathbf{r}_i^m$  is:

$$49 \quad \mu_m \dot{\mathbf{r}}_i^m = -\frac{\partial U^m}{\partial \mathbf{r}_i^m}$$

50 where  $\mu_m$  is the matrix viscous friction,  $U^m$  is the interaction potential for the matrix. Similar to the cell  
 51 dynamics, we have assumed that the inertial effects are negligible and hence considered an overdamped  
 52 motion. The interaction potential for the matrix  $U^m$  has three contributions:

$$53 \quad U^m(\mathbf{x}) = \frac{1}{2} \sum_i u_i^E + \frac{1}{2} \sum_j \sum_{i \neq j} u_{ij}^m + \frac{1}{2} \sum_k \sum_i u_{ik}^{tm},$$

54 the first term is the elastic interaction for individual beads, we consider that each bead 'i' is attached to  
 55 its initial position  $\mathbf{r}_i^{m-0}$  and if the bead gets displaced from its initial position to a new position  $\mathbf{r}_i^m$ , due  
 56 to the elastic nature bead tries to go back to its initial position. We assume the interaction to be:

$$57 \quad u_i^E = G'(\mathbf{r}_i^m - \mathbf{r}_i^{m-0})^2;$$

58 where  $G'$  is the elasticity coefficient. If the distance of the bead to its attached position  $|\mathbf{r}_i^m - \mathbf{r}_i^{m-0}| >$   
 59  $0.5a$ , we assume that the bead breaks away from its attached position and acquires a new attached

60 position which is its current position, i.e.,  $\mathbf{r}_i^{m-0} = \mathbf{r}_i^m$ . The second term is the interaction between the  
 61 beads themselves, which we consider having short-range repulsion to avoid the overlap and mid-range  
 62 (two bead size) attraction, and no long-range (greater than two bead size) interaction<sup>7</sup>:

$$63 \quad u_{ij}^m = \begin{cases} \epsilon \left( \left( \frac{a}{r_{ij}} \right)^2 - 1 \right) \left( \left( \frac{r_c}{r_{ij}} \right)^2 - 1 \right)^2 & \text{for } r_{ij} \leq r_c ; \\ 0 & \text{for } r_{ij} > r_c \end{cases}$$

64 where  $r_c = 2a$ ; the third term is due to the repulsive interaction between the bead and the cell of  
 65 diameter  $a$  to avoid the overlap and that to be harmonic:

$$66 \quad u_{ik}^{tm} = \begin{cases} k_{tm} (r_{ik} - a)^2 & \text{for } r_{ik} < a \\ 0 & \text{for } r_{ik} \geq a \end{cases}$$

67 where  $r_{ij} = |\mathbf{r}_j^m - \mathbf{r}_i^m|$  is the distance between the bead ' $i$ ' and ' $j$ ' and  $r_{ik} = |\mathbf{r}_k^t - \mathbf{r}_i^m|$  is the distance  
 68 between the cell ' $k$ ' and matrix bead ' $i$ '.

## 69 Initial Setup

70 We start with a spherical ball of cells of radius  $R_0 = 4a$ , which is made of 79 cells (except mentioned  
 71 otherwise) and these cells are uniformly, randomly distributed within the spherical ball. This spherical  
 72 ball of cells is surrounded by a concentric spherical shell of matrix of inner radius  $R_{in} = 5a$  and outer  
 73 radius  $R_{out} = 12a$ , which is made of 6330 beads (except mentioned otherwise) and these beads are  
 74 tightly packed in an orderly fashion on the surface of a sphere with radius ' $ka$ ' ( $k \in [R_{in} - R_{out}]$ ) within  
 75 the spherical shell. We keep the tissue viscosity  $\mu_t$  fixed for all the simulations except at the very end. We  
 76 vary the matrix viscosity such that the viscosity ration  $\mu = \frac{\mu_t}{\mu_m} = 0.002$  and 2 for the viscoelastic and the  
 77 elastic case, respectively. To change the stiffness, we vary the matrix elasticity coefficient  $G' =$   
 78 05, 50, & 100 for the soft, intermediate, and stiff case, respectively, varying the matrix relaxation time  
 79  $\tau_m = \frac{\mu_m}{G'}$ . To accommodate the linear relationship between the stiffness and the random motility of the



80 cells, we use a linear relationship between stiffness and motility, and for three different stiffness of the  
81 matrix, we use the cell motility parameter  $M = 0.2, 0.8, \& 1.6$  for the soft, intermediate, and stiff matrix  
82 case, respectively. For the intermediate viscoelastic matrix, *i.e.*,  $\mu_m = 10, G' = 50$ , and the stiff  
83 viscoelastic case, *i.e.*,  $\mu_m = 10, G' = 100$ , the proliferation is high and long fingers of the tissue exceed  
84 the matrix environment, to prevent this we used a thicker matrix with outer radius of the spherical shell  
85  $R_{out} = 14 \& 20$ , respectively. We used 10,240 & 30,710 beads in the matrix for the intermediate and stiff  
86 viscoelastic cases, respectively. For the stiff viscoelastic matrix case the proliferation is significantly high  
87 (Fig. 3c,j) and even with this thick matrix of size  $R_{out} = 20$ , with 30,710 beads, we could capture the  
88 correct physics only up to time  $\sim 180 \tau_g$ , and the simulations after this time show that the fingers of  
89 tissues started to outgrow the matrix size. We did more than one simulation for all the six matrix cases  
90 mentioned above, *i.e.*, soft elastic & viscoelastic; intermediate elastic & viscoelastic; stiff elastic &  
91 viscoelastic; and they show statistically similar behavior.

92 For the case where we inhibit the cell motility, we use a very small motility parameter  $M = 0.01$ , for all  
93 the six conditions. For the case, where we inhibit the cell proliferation, we have used a slightly higher  
94 number of cells, *i.e.*, 113, to start with a densely packed the spherical ball of the cells, as the number of  
95 cells will not increase with time. We performed two sets of simulation with the six conditions of matrix,  
96 for the cases where motility has been inhibited and where proliferation has been inhibited.

97

## 98 **Simulations for phase diagram**

99 To explore the regimes of morphological stability, in terms of the three dimensionless parameters, we  
100 change the tissue viscosity ratio  $\mu = \frac{\mu_t}{\mu_m}$  from 0.001 – 2. For each case of tissue viscosity ratio  $\mu$ , we  
101 consider three cases of stiffness, *i.e.*,  $G' = 5, 50, \& 100$ , and perform the simulations. Since, the cell

102 proliferation is an indirect function matrix rheology, the scaled cell flux  $j = \frac{\tau_g}{\tau_t}$  is an emergent parameter,  
103 recalling  $\tau_t$  is the time it takes to add one cell to the tissue. We observe both in experiments and  
104 simulations that as we decrease the matrix viscosity  $\mu_m$  and increase the matrix stiffness  $G'$ , cell  
105 proliferation increases and hence cell flux  $j$  increases. In our experiments the highest cell proliferation  
106 occurs in the Stiff Viscoelastic matrix and using linear regression we estimate that the tissue doubles in  
107 size in 20.5hr. This corresponds to value of  $\tau_t \sim 37s$  in the stiff viscoelastic matrices; in contrast,  $\tau_t \sim 330s$   
108 in stiff elastic matrices due to its much slower tissue growth. These are in the same order of magnitude  
109 of the relaxation times of the matrices. The resulting cell flux, when the initial spheroid is composed of  
110 2000 cells, is  $j = 0.027$ . For the stiff elastic case,  $j = 0.0030$ .

111 To generate the phase-diagram we developed a custom Matlab software and used support vector  
112 machines (SVM) classifier for binary classification. For the cases where motility is small, thence the  
113 proliferation is small, i.e.,  $j \sim 0$ , the growth of the spheroidal tissue for all the conditions were stable. We  
114 have plotted the corresponding two-dimensional phase-diagram (Extended Data Fig.8b) and the  
115 background looks completely blue, an indicator that the tissue growth for the scaled cell flux  $j \sim 0$  is always  
116 stable. The data from actual simulations were represented as blue dots. For moderate values of scaled  
117 cell flux  $j \sim O(1)$ , we have plotted a three-dimensional phase diagram (Fig 5, Extended Data Fig.8a). We  
118 observe that as the scaled proliferation increases the region of stability starts to shrink in  $\mu - A$  plane and  
119 eventually the whole phase space becomes unstable.

### 120 **Controlled cell flux driven simulations**

121 For the controlled cell flux driven tissue growth, we relax the stress dependent cell proliferation condition.  
122 With this relaxed constraint, we add one cell (mass) after time  $\tau_t$  at the center of the tissue to mimic the  
123 experiments, where the cell flux injection is controlled, and new cells (mass) are being added at the center  
124 of the tissue. By controlling  $\tau_t$  we can control the cell flux injection rate, which gives us a precise control

125 over scaled cell flux  $j$ . This was not the case for stress dependent cell proliferation simulations. We vary  
126 the proliferation time scale  $\tau_t \in [0.1 - 1]$  to control the scaled cell flux  $j$ .

127 Using the data from our simulations we have generated a two-dimensional Phase-diagram (Extended Data  
128 Fig.8c) for the controlled flux driven case. We have fixed the scaled cell flux  $j = 10$ , and varied the viscosity  
129 ratio  $\mu \in [0.1 - 10]$  for the three values of elasticity  $G' = 0$  (to mimic the viscous Saffman-Taylor  
130 instability<sup>8</sup>), 0.1 (softer than the control soft matrix case), and 5 (soft matrix). The phase-diagram  
131 (Extended Data Fig.8c) shows an opposite trend where the region close to origin (elastic matrices,  
132 Extended Data Fig. 7d,e) becomes unstable and the region away from origin (viscoelastic matrices,  
133 Extended Data Fig. 7d,e) becomes stable. The data from actual simulations were represented as blue dots  
134 for spheroidal growth of the tissue and red dots for the branched growth of the tissue.

### 135 **Simulations with dynamic change in viscosity of the matrix**

136 To see the effects of dynamic change in the viscosity of the matrix on the tissue growth, we considered  
137 two cases: (i) At the start of the simulation, matrix is elastic ( $A = \frac{\tau_a}{\tau_m} = 0.017, \mu = \frac{\mu_t}{\mu_m} = 0.002, j = \frac{\tau_g}{\tau_t} =$   
138  $0.05$ ) in nature and after a certain time ( $15 \tau_g$ ) matrix smoothly changes its viscous property and becomes  
139 viscoelastic ( $A = \frac{\tau_a}{\tau_m} = 133, \mu = \frac{\mu_t}{\mu_m} = 2, j = \frac{\tau_g}{\tau_t} = 0.16$ ) in nature (ii) At the start of the simulation, the  
140 matrix is viscoelastic ( $A = \frac{\tau_a}{\tau_m} = 133, \mu = \frac{\mu_t}{\mu_m} = 2, j = \frac{\tau_g}{\tau_t} = 0.16$ ) in nature and after certain time ( $15 \tau_g$ )  
141 matrix smoothly changes its viscous property and becomes elastic ( $A = \frac{\tau_a}{\tau_m} = 0.017, \mu = \frac{\mu_t}{\mu_m} = 0.002, j =$   
142  $\frac{\tau_g}{\tau_t} = 0.05$ ) (Supplementary Fig 5 a). In both the cases matrix maintains its stiffness ( $G'$ ) and it changes only  
143 its viscosity  $\mu_m$  to control the viscoelasticity of the matrix. The property of the tissue is same for both of  
144 these cases. In Supplementary Fig. 5 b, we show the images of the evolution of the tissue for case (i) (top  
145 row) and case (ii) (bottom row). For case (i) we see that as soon as we start to reduce the viscosity, there  
146 is rapid growth of spheroidal tissue, the spheroid starts to break the symmetry and eventually budding

147 starts. The same can be confirmed from the Supplementary Fig. 5 c-d, where we have quantified the area  
 148 and circularity of the cross-section of the tissue. There is sudden increase in the area and reduction in the  
 149 circularity as we change the property of the matrix from elastic to viscoelastic. For case (ii) we see that  
 150 initially, the growth of the spheroidal tissue is rapid, there are initial signs of budding, but as we increase  
 151 the viscosity of the matrix, there is arrest of growth and there is no new bud formation. We further  
 152 quantified it by looking at the area and circularity of the cross-section of the spheroidal tissue. As soon as  
 153 the viscosity of the matrix increases there is arrest in the growth of the cross-sectional area of the tissue  
 154 and rapid decrease in the circularity stops, reverses the trend with slow increase in the overall circularity  
 155 value with time. These results indicate that by dynamically changing the property of the ECM (decreasing  
 156 the viscosity of the matrix) around the tissue we can go from morphologically stable to morphologically  
 157 unstable tissue growth (case i) and similarly by increasing the viscosity of the ECM we can control the  
 158 morphologically unstable tissue growth (case ii).

### 159 **Simulations of the Organoids**

160 In our experiments, an organoid comprised of motile, proliferating epithelial cells is initially encapsulated  
 161 in a viscoelastic gel. The model for spheroidal tissue growth is modified to simulate the organoid by  
 162 changing the cell-cell interaction. We perform the simulations for a two-dimensional organoid model. In  
 163 the model, the organoid cells are arranged as a chain of cells to mimic the cross-section of an organoid.  
 164 These cells are always linked to their neighbors through a spring (to avoid stretching and compression)  
 165 and try to maintain an angle of  $\pi$  between two neighboring connections (to avoid bending). In a relaxed  
 166 state, this interaction puts the cells of the organoid on the circumference of a perfect circle. The inter-  
 167 cellular interaction for the organoid will have two contributions, one from the stretching/compression  
 168 and the other from the bending. The interaction potential for a cell will be given by

$$169 \quad u_i^t = \frac{1}{2} k_s [(\mathbf{r}_i - \mathbf{r}_{i-1} - a)^2 + (\mathbf{r}_i - \mathbf{r}_{i-1} - a)^2] + \frac{1}{2} k_b (\widehat{\mathbf{n}}_{-1} - \widehat{\mathbf{n}}_1)^2,$$

170 Where  $k_s$  is spring coefficient and  $k_b$  is bending coefficient,  $\widehat{\mathbf{n}}_{-1}$  and  $\widehat{\mathbf{n}}_1$  are the unit vector in the direction  
 171  $(\mathbf{r}_i - \mathbf{r}_{i-1})$  and  $(\mathbf{r}_i - \mathbf{r}_{i+1})$ , respectively. ' $i - 1$ ' and ' $i + 1$ ' are the left and right neighbors of the cell ' $i$ ',  
 172 respectively. There is periodicity for the chain of cells, which means for cell number  $i = 1$ , the  $i - 1 = N$ ,  
 173 and for cell number  $i = N$ , the  $i + 1 = 1$ .  $N$  is total number of cells in the organoid at a given instant.

174 The total interaction potential  $U^t$  for the system of cells will have two contributions similar to spheroidal  
 175 model:

$$176 \quad U^t(\mathbf{x}) = \frac{1}{2} \sum_i u_i^t + \frac{1}{2} \sum_k \sum_i u_{ik}^{tm},$$

177 Where  $u_i^t$  is the contribution from the cell-cell interaction which we have defined in the previous  
 178 paragraph and  $u_{ik}^{tm}$  is the contribution from the tissue-matrix interaction, which we are keeping same as  
 179 spheroidal-tissue model. The interaction potential for the matrix is same as the spheroidal-tissue model.  
 180 The dynamics of the position of the cell and the bead of the matrix is same as the spheroidal-tissue model.  
 181 In the organoid model, the cell division has the same criterion as in the spheroidal tissue model. If a new  
 182 cell-division happens it takes a position between two cells with a probability which is local stress  
 183 dependent.

#### 184 **Initial Setup for the Organoids**

185 All the simulations for the organoid start with  $N = 26$  cells, which are placed at the circumference of  
 186 circle of radius  $4a$ . This circle of cells is surrounded by a concentric annulus of matrix of inner radius  $R_{in} =$   
 187  $5a$  and outer radius  $R_{out} = 14a$ , which is made of 655 beads (except mentioned otherwise) and these  
 188 beads are tightly packed in an orderly fashion on the periphery of a circle with radius ' $ka$ ' ( $k \in [R_{in} -$   
 189  $R_{out}]$ ) within the annulus. We terminate the simulation once the organoid touches the outer radius of  
 190 the matrix.

191 We have considered six matrix cases to see the effect of stiffness and the viscosity on the organoidal  
192 growth. We have considered the viscosity ratios  $\frac{\mu_t}{\mu_m} = 0.002$  and  $\frac{\mu_t}{\mu_m} = 2$ , same as spheroidal model, and  
193 call them as elastic and viscoelastic matrix, respectively. For each case of viscosity ratio  $\mu$ , we consider  
194 three cases of stiffness, i.e.,  $G' = 5, 50, \& 100$ , call them soft, intermediate and stiff respectively, and  
195 perform the simulations.

196 In Supplementary Fig 16 a, we show the images of organoids for stiff elastic (top) and stiff viscoelastic case  
197 (bottom) at time  $t = 12\tau_g$ . Supplementary Fig 16 b-c, show that for viscoelastic cases the organoids grow  
198 rapidly and break their circular symmetry and become morphologically unstable, whereas for elastic case  
199 the organoid growth remains stable and circularly symmetric. Supplementary Fig 16 d, show the images  
200 of organoids for elastic (top row) and viscoelastic case (bottom row) with increasing stiffness (left to right)  
201 at time  $t = 12\tau_g$ . With increasing stiffness, the symmetry breaking is more prominent for viscoelastic  
202 case, whereas the effect of stiffness is milder for elastic case. The finding that the organoids are  
203 morphologically stable in elastic matrices and morphologically unstable in the viscoelastic matrices and  
204 with stiffness their growth increases, and circularity decreases is in good agreement with the experiments  
205 and similar to what we have found in our spheroidal tissue simulations.

206 In Supplementary Fig. 19, we have reduced the motility of the organoid cells ( $\mathcal{M} \sim 0$ ) and we find that  
207 independent of viscosity and stiffness the growth of the organoid is stalled (Supplementary Fig. 19b) and  
208 organoid maintains a circularly symmetrical morphology (Supplementary Fig. 19c).

209 In Supplementary Fig. 20, we have reduced the proliferative capacity to zero the organoid cells ( $j \sim 0$ ) and  
210 we find that independent of viscosity and stiffness the growth of the organoid is stalled (Supplementary  
211 Fig. 20b) and organoid maintains a circularly symmetrical morphology (Supplementary Data Fig. 20c).

212

## 213 **Organoids with multiple cell types**

214

215 To test whether the change in cell type within the organoid can be correlated with location of the  
216 symmetry breaking, we considered two simple cases where we placed cells at given locations in the  
217 organoid (i) with relatively higher motility compare to the rest of the cells of organoid (ii) with relatively  
218 higher proliferation rate compare to the rest of the cells of organoid. For all these tests, we considered  
219 the evolution of organoid in the soft-viscoelastic matrix.

### 220 **Case i: Cells with High Motility**

221 We first investigated the effect of intensity of relative motility  $\left(\frac{\mathcal{M}}{\mathcal{M}_0}\right)$  and then for a fixed relative motility  
222 the effect of number of high motile cells  $N_{\text{mot}}$  on the growth of the organoid.

223 We replaced two of the normal cells in the organoid with highly motile cells. We increased the degree of  
224 motility systematically, e.g., motility ratio  $\frac{\mathcal{M}}{\mathcal{M}_0} = 2, 3, 4 \text{ \& } 5$ , and looked at the growth of organoid. We find  
225 that the addition of highly motile cells enhances the morphological disorder (Supplementary Fig. 21). In  
226 the Supplementary Fig. 21a, we show the images of the organoid at time  $t = 8\tau_g$  with the increasing  
227 degree of motility ratio  $\frac{\mathcal{M}}{\mathcal{M}_0}$ . For  $\frac{\mathcal{M}}{\mathcal{M}_0} = 2$ , the location of the morphological instabilities are not correlated  
228 with the position of the cells with high motility but for the case  $\frac{\mathcal{M}}{\mathcal{M}_0} = 3, 4, \text{ \& } 5$ , the location of the  
229 morphological instability is directly correlated with the position of the high motility cells (black color cells  
230 in Supplementary Fig 21a). In Supplementary Fig 21b-c, we have reported the area and circularity of the  
231 organoid with increasing degree of motility, we find that growth of organoid is same for  $\frac{\mathcal{M}}{\mathcal{M}_0} = 3, 4, \text{ \& } 5$   
232 (Supplementary Fig 21b) but the circularity decreases (morphological instability increases) with increasing  
233 degree of motility (Supplementary Fig 21c). This implies that replacing a few regular organoid cells with

234 highly motile cells will not affect the growth (the smaller motility of the rest of the cells will dominate the  
235 growth) but it will definitely affect the morphological instability of the organoid.

236 To ensure that the location of the cells with high motility is directly correlated with the location of the  
237 morphological instabilities, we increase the number of cells with high motility. We kept the motility ratio  
238 fixed to  $\frac{\mathcal{M}}{\mathcal{M}_0} = 4$ , and systematically increased the number of cells with high motility  $N_{\text{mot}} = 2, 3, \& 4$ . In

239 Supplementary Fig 22 a, we show that the location of morphological instabilities are directly correlated  
240 with the highly motile cells (black color cells). In Supplementary Fig 22 b-c, we report the area and  
241 circularity of the organoid with increasing number of high motile cells  $N_{\text{mot}}$ , we see that there is an  
242 increase in growth and decrease in the circularity of the organoid with increasing  $N_{\text{mot}}$ .

#### 243 **Case ii: Cells with High Proliferation**

244 To study the effect of the cells with relative high proliferation on the growth of the organoid, we replaced  
245 four of the normal cells in the organoid with cells of high proliferation. To control the proliferation in the  
246 model, we add an additional control on the probability with which we accept the cell division for  $\Delta E > 0$   
247 is  $\exp\left(-\frac{\mathcal{P}_0}{\mathcal{P}} \frac{8\Delta E}{\mathcal{M}}\right)$ , for regular cell  $\mathcal{P} = \mathcal{P}_0$ , which brings back the regular probability for the regular cells of  
248 the organoid to accept the cell division. Since, the growth of organoid is morphologically unstable in soft  
249 viscoelastic matrix (Supplementary Fig 16), so we have increased the energy cost for the cell division by a  
250 factor 8, i.e.,  $8\Delta E$  to reduce the proliferation of all the cells of the organoid in general, this gives us a  
251 morphologically stable organoid when all cells are of same kind  $\left(\frac{\mathcal{P}}{\mathcal{P}_0} = 1\right)$ . We are systematically increasing

252 the degree of proliferation, i.e.,  $\frac{\mathcal{P}}{\mathcal{P}_0} = 1, 5, 10, 20 \& 100$ . In Supplementary Fig 23 a, we show the images  
253 of the organoid at time  $t \sim 10\tau_g$ , for  $\frac{\mathcal{P}}{\mathcal{P}_0} = 1 \& 5$ ; the growth of the organoid is morphologically stable; only

254 when the degree of proliferation crosses a certain value, e.g.,  $\left(\frac{\mathcal{P}}{\mathcal{P}_0} = 10, 20 \& 100\right)$ , the organoid becomes  
255 morphologically unstable. We observe that when the organoids become morphologically unstable the



256 location of the instabilities are directly correlated with the position of the cells with high proliferation (the  
257 two images in the right of Supplementary Fig 23 a). In Supplementary Fig 23 b-c, we reported the area  
258 and circularity of the organoid for the cells with high proliferation. The growth increases and circularity  
259 decreases (morphological instability increases) with the increase in the degree of proliferation of the cells  
260 with high proliferation.

## 261 **Simulation Methods**

262 We developed an inhouse Fortran-90 code to model the growth of spheroids in a viscoelastic matrix. The  
263 simulations were performed using the Euler-Maruyama method with a Langevin term and integrating in  
264 time. We use reduced, dimensionless unit, all lengths in terms of typical cell size ' $a$ ',  $r^* = r/a$ ; and all the  
265 time in terms of cell proliferation time  $\tau_g$ ;  $t^* = t/\tau_g$ . We use Mersenne Twister algorithm, a  
266 pseudorandom number generator, to generate the random numbers.

## 267 **Quantification of tissue shape properties of simulations**

268 A custom MATLAB software was developed to measure, during the simulations, the tissue shape  
269 properties. Briefly, as the simulations are performed assuming that cells are discrete points, we first  
270 spherically dilate each point to generate a continuous volume. Then, once we have the connected mesh,  
271 the volume and sphericity are quantified. The area and circularity were quantified from the middle plane  
272 of the spheroid.

273

274 **Supplementary Table 1.** Alginate hydrogel composition.

| Alginate Molecular weight (kDa) | Stiffness (Pa) | Alginate (%) | Calcium sulphate (mM) |
|---------------------------------|----------------|--------------|-----------------------|
| 138                             | 390            | 2            | 16.8                  |
| 138                             | 1855           | 2            | 28.8                  |

|     |      |   |      |
|-----|------|---|------|
| 138 | 4959 | 2 | 57.6 |
| 38  | 409  | 2 | 33.6 |
| 38  | 1618 | 2 | 52.8 |
| 38  | 5095 | 2 | 96   |

275

276 **Supplementary Table 2.** Table for dimensionless quantities in the simulation.

| Parameter                                                    | Simulations                               | Experiments                   |
|--------------------------------------------------------------|-------------------------------------------|-------------------------------|
| Cell Size (a)                                                | $10^{-5}$ m                               | $\sim 10^{-5}$ m              |
| Motility Speed ( $v_{\text{mig}} = \frac{D}{a}$ )            | $1 \times 10^{-9} - 1 \times 10^{-6}$ m/s | $\sim 5 \times 10^{-8}$ m/s   |
| Activity Time Scale ( $\tau_a = \frac{M}{\epsilon} \tau_g$ ) | 7-54 s                                    | $\sim 2-40$ s <sup>9-11</sup> |
| Viscoelastic Time Scale ( $\tau_m = \frac{G'}{\mu_m}$ )      | 0.5-1000 s                                | 30-350 s                      |
| Viscosity Ratio ( $\mu = \frac{\mu_t}{\mu_m}$ )              | 0.001-2                                   | 0.00019-0.066                 |
| Scaled Activity ( $A = \frac{\tau_a}{\tau_m}$ )              | 0.1-100                                   | 0.028-40                      |
| Scaled Cell Flux ( $j = \frac{\tau_g}{\tau_t}$ )             | 0.002-10                                  | $\sim 0.003-166$              |

277

278 **Supplementary Table 3.** Alginate-matrigel interpenetrating networks composition.

| Alginate Molecular weight (kDa) | Stiffness (Pa) | Alginate (%) | Matrigel (mg/ml) | Calcium sulfate (mM) |
|---------------------------------|----------------|--------------|------------------|----------------------|
| 138                             | 473            | 1            | 5                | 26.4                 |
| 138                             | 1489           | 1            | 5                | 48                   |
| 38                              | 452            | 1            | 5                | 48                   |
| 38                              | 1422           | 1            | 5                | 96                   |

279

280  
281  
282  
283  
284  
285

**References:**

286 1 Berthier, L. & Kurchan, J. Non-equilibrium glass transitions in driven and active matter. *Nature*  
287 *Physics* **9**, 310-314, doi:10.1038/nphys2592 (2013).

288 2 Mallory, S. A., Šarić, A., Valeriani, C. & Cacciuto, A. Anomalous thermomechanical properties of a  
289 self-propelled colloidal fluid. *Physical Review E* **89**, 052303, doi:10.1103/PhysRevE.89.052303  
290 (2014).

291 3 Wang, X., Ramírez-Hinestrosa, S., Dobnikar, J. & Frenkel, D. The Lennard-Jones potential: when  
292 (not) to use it. *Physical Chemistry Chemical Physics* **22**, 10624-10633, doi:10.1039/C9CP05445F  
293 (2020).

294 4 Kardar, M. *Statistical Physics of Fields*. (Cambridge University Press, 2007).

295 5 Uroz, M. *et al.* Regulation of cell cycle progression by cell-cell and cell-matrix forces. *Nature cell*  
296 *biology* **20**, 646-654, doi:10.1038/s41556-018-0107-2 (2018).

297 6 Delarue, M. *et al.* Compressive Stress Inhibits Proliferation in Tumor Spheroids through a  
298 Volume Limitation. *Biophysical journal* **107**, 1821-1828,  
299 doi:<https://doi.org/10.1016/j.bpj.2014.08.031> (2014).

300 7 Hastings, W. K. Monte Carlo Sampling Methods Using Markov Chains and Their Applications.  
301 *Biometrika* **57**, 97-109, doi:10.2307/2334940 (1970).

302 8 Saffman, P. G. & Taylor, G. I. The penetration of a fluid into a porous medium or Hele-Shaw cell  
303 containing a more viscous liquid. *Proceedings of the Royal Society of London. Series A.*  
304 *Mathematical and Physical Sciences* **245**, 312-329, doi:doi:10.1098/rspa.1958.0085 (1958).

305 9 Liu, Z. *et al.* Mechanical tugging force regulates the size of cell-cell junctions. *Proceedings of the*  
306 *National Academy of Sciences of the United States of America* **107**, 9944-9949,  
307 doi:10.1073/pnas.0914547107 (2010).

308 10 Maruthamuthu, V., Sabass, B., Schwarz, U. S. & Gardel, M. L. Cell-ECM traction force modulates  
309 endogenous tension at cell-cell contacts. *Proceedings of the National Academy of Sciences of the*  
310 *United States of America* **108**, 4708-4713, doi:10.1073/pnas.1011123108 (2011).

311 11 Maitre, J. L. & Heisenberg, C. P. The role of adhesion energy in controlling cell-cell contacts.  
312 *Current opinion in cell biology* **23**, 508-514, doi:10.1016/j.ceb.2011.07.004 (2011).

313  
  
314  
315  
316  
317
